1

## 2**Simulating multi-level dynamics of antimicrobial resistance in** 3**a membrane computing model**

4

5Marcelino Campos<sup>1,3,5</sup>, Rafael Capilla<sup>2</sup>, Fernando Naya<sup>2</sup>, Ricardo Futami<sup>2</sup>, Teresa  
6Coque<sup>1,4,5</sup>, Andrés Moya<sup>5,6,7</sup>, Val Fernandez-Lanza<sup>1,8</sup>, Rafael Cantón<sup>1,4,5</sup>, José M.  
7Sempere<sup>3</sup>, Carlos Llorens<sup>2\*</sup>, Fernando Baquero<sup>1,4,5\*</sup>

8

9<sup>1</sup>Department of Microbiology, Ramón y Cajal University Hospital, IRYCIS, Carr. de  
10Colmenar, km. 9,100, 28034 Madrid, Spain. <sup>2</sup>Biotechvana, Valencia, CEEI Building,  
11Benjamin Franklin Av. 12, Valencia Technological Park, 46980 Paterna, Spain.  
12<sup>3</sup>Department of Information Systems and Computation (DSIC), Universitat Politècnica  
13de València, Camino de Vera, 46022 Valencia, Spain. <sup>4</sup>Antibiotic Resistance and  
14Bacterial Virulence Unit (HRYC-CSIC), associated to the Superior Council of Scientific  
15Research (CSIC), Madrid, Spain. <sup>5</sup>Network Research Center for Epidemiology and  
16Public Health (CIBER-ESP), Madrid, Spain. <sup>6</sup>Integrative Systems Biology Institute,  
17University of Valencia and Spanish Research Council (CSIC), Catedrático José Beltrán  
182, 46980 Paterna, Valencia, Spain, <sup>7</sup>Foundation for the Promotion of Sanitary and  
19Biomedical Research in the Valencian Community (FISABIO) Avenida de Cataluña 21,  
2046020 Valencia, Spain; <sup>8</sup>Bioinformatics Support Unit, IRYCIS, Carretera de Colmenar,  
21km. 9,100, 28034 Madrid, Spain.

22

23\*To whom correspondence should be addressed: Fernando Baquero, Department of  
24Microbiology, Ramón y Cajal University Hospital, Carretera de Colmenar km 9,1.  
2528034 Madrid, Spain. Email: [baquero@bitmailer.net](mailto:baquero@bitmailer.net), and Carlos Llorens,  
262Biotechvana, Valencia, CEEI Building, Benjamin Franklin Av. 12, Valencia  
27Technological Park, 46980 Paterna, Spain. E-mail: [carlos.llorens@biotechvana.com](mailto:carlos.llorens@biotechvana.com)

28\*Co-corresponding authors.

29**Short Title:** Multi-level modeling in antibiotic resistance

30**Key- Words:** Membrane computing, multi-hierarchical evolution, antibiotic-resistance,  
31computing model simulation.

32

33

34

35

36

37

38

39

40

41

42

## 43Abstract

44Membrane Computing is a bio-inspired computing paradigm, whose devices are the so-  
45called membrane systems or P systems. The P system designed in this work reproduces  
46complex biological landscapes in the computer world. It uses nested “membrane-  
47surrounded entities” able to divide, propagate and die, be transferred into other  
48membranes, exchange informative material according to flexible rules, mutate and being  
49selected by external agents. This allows the exploration of hierarchical interactive  
50dynamics resulting from the probabilistic interaction of genes (phenotypes), clones,  
51species, hosts, environments, and antibiotic challenges. Our model facilitates analysis of  
52several aspects of the rules that govern the multi-level evolutionary biology of antibiotic  
53resistance. We examine a number of selected landscapes where we predict the effects of  
54different rates of patient flow from hospital to the community and *viceversa*, cross-  
55transmission rates between patients with bacterial propagules of different sizes, the  
56proportion of patients treated with antibiotics, antibiotics and dosing in opening spaces  
57in the microbiota where resistant phenotypes multiply. We can also evaluate the  
58selective strength of some drugs and the influence of the time-0 resistance composition  
59of the species and bacterial clones in the evolution of resistance phenotypes. In  
60summary, we provide case studies analyzing the hierarchical dynamics of antibiotic  
61resistance using a novel computing model with reciprocity within and between levels of  
62biological organization, a type of approach that may be expanded in the multi-level  
63analysis of complex microbial landscapes.

64

65

66

## 67Introduction

68Antibiotic resistance is the result of the complex interaction of discrete evolutionary  
69entities placed in different hierarchical levels of biological organization, including  
70resistance genes, mobile genetic elements, clones, species, genetic exchange  
71communities, microbiomes, and hosts of these bacterial ensembles placed in particular  
72biological environments (1,2,3). Under the influence of external environmental variation  
73(such as exposure to antibiotics) each one of these evolutionary entities might have  
74independent rates of variation and selection, but as they are hierarchically-linked, the  
75changes in each one of them can influence all other entities (4), as they constitute a  
76global “nested biological system” (5).

77Membrane-computing is an individual-based natural computing paradigm aiming to  
78abstract computing ideas and models from the structure and the functioning of living  
79cells, as well as from the way the cells are organized in tissues or higher order structures  
80(6,7). A kind of computational models using this paradigm are “P systems”, consisting  
81in placing objects (in our case biological entities) into virtual cell-like or tissue-like  
82membrane structures, so that one membrane or one cell (respectively) represents a  
83hierarchical level, a region of the embedded system. For instance, each bacterial cell is a  
84membrane containing plasmids (as objects), and a plasmid is a membrane containing  
85genes (as objects). The mobility of entities, objects, across membranes is possible  
86according to pre-established rewriting rules, and the collection of multisets of entities  
87will evolve in a synchronous, parallel, and non-deterministic manner. The objects have  
88assigned rules to pass through membranes (to mimic intracellular or intercellular  
89transmission (8,9), to dissolve (to mimic elimination), and to divide themselves (to  
90mimic replication). In this work, we use a P system to simulate multi-level dynamics of  
91antibiotic resistance, based on our first published prototype (8,9). This computational

92model facilitates an approach that is computationally hard to accomplish or simply  
93impossible to address experimentally. Our work allows the estimation and evaluation of  
94global and specific effects on the frequency of each one of the biological entities  
95involved in antibiotic resistance occurring because of changes taking place (as  
96following antibiotic exposure) in one or (simultaneously) in several of them. Note that  
97albeit antibiotic resistance is a major problem in Public Health, in terms of biosystems it  
98is only a particular example of “evolution in action”. Our model can be easily applied to  
99many other complex evolutionary landscapes, involving other genes, phenotypes, cells,  
100populations, communities and ecosystems.

101

## 102**Results**

103The main objective of the present work is to present the possibilities of membrane  
104computational modeling as a powerful tool in the evaluation of the factors that, at  
105various biological levels, might influence the dynamics of antibiotic resistance. The  
106results provided below should not be taken as predictions of the evolution of resistance,  
107just as illustrations of some of the possibilities of this model to study the multi-level  
108dynamics of resistance, by simultaneously changing parameters in state variables and  
109observing after a single run the effect in the frequency of resistant species and  
110populations. Note that the model is probabilistic and the rules are selected in a  
111probabilistic way. So, each computation produces an output in such manner that the  
112results obtained are not entirely identical in consecutive runs of the program, but they  
113are relatively close (see Fig SI1). In the next paragraphs, antibiotics (Ab) and the  
114corresponding resistances (R) are named AbA, AbC and AbF, and AbAR, AbCR, and  
115AbFR respectively; to facilitate reading, we suggest the identification of AbA as the

116Aminopenicillins, AbC as Cefotaxime-Ceftazidime, and AbF as Fluoroquinolones,  
117using the initials of three of the major groups of antibiotics used in clinical practice  
118(Table 1).

## 119The basic scenario in the hospital and community compartments

120Dynamics of bacterial resistance phenotypes in *E. coli*. Waves of successive  
121replacements of resistance phenotypes in hospital-based *E. coli* during 20,000 time-  
122steps (about 2.3 years, as the time-steps represent approximately 1 hour/step) are  
123illustrated in Fig 1. The main features of this process, mimicking clonal interference,  
124are: 1) sharp decrease in the density of the fully susceptible phenotype (pink line); 2)  
125rapid increase of the phenotype AbAR, aminopenicillin resistance, resulting from the  
126transfer of the plasmid with AbAR to the susceptible population, and consequent  
127selection (red); 3) increase by selection, and marginally by acquisition of mutational  
128resistance, of the phenotype AbFR , fluoroquinolone resistance (violet); 4) increase of  
129double resistances AbAR and AbFR, by acquisition of an AbFR mutation with the  
130organisms of AbAR-only phenotype, and by the transfer of the plasmid encoding AbAR  
131from the AbAR-only phenotype to the AbFR-only phenotype (brown); 5) increase of the  
132phenotype with double resistances AbAR and AbCR by capture by the AbAR-only  
133predominant phenotype of a plasmid containing AbCR, cefotaxime resistance that  
134originated in *K. pneumoniae* (light blue); 6) almost simultaneous emergence but later  
135predominance of the multi-resistant organisms with phenotype AbAR, AbCR, and AbFR  
136by mutational acquisition of AbFR by the double-resistant phenotype AbAR-AbCR and,  
137also, of the plasmid-mediated AbCR by the AbAR-AbFR phenotype (dark blue); 7)  
138close in time, emergence, but with low density, of the phenotype AbCR-only, by the  
139acquisition of the plasmid encoding AbCR by the fully-susceptible phenotype and the  
140AbAR phenotype, and loss of plasmid-mediated AbAR by incompatibility with the

141 incoming plasmid (light green); 8) the acquisition of the AbFR mutation by the AbCR-  
142 only phenotype, or by plasmid-reception of an AbCR trait from *K. pneumoniae* in  
143 AbFR, giving rise to the phenotype AbCR-AbFR (olive green). In the community,  
144 where the antibiotic exposure is less frequent, a similar dynamic sequence occurs, but at  
145 a much slower rate (fig. 2).

146 **Dynamics of bacterial species.** Antibiotic use and antibiotic resistance influence the  
147 long-term dynamics of bacterial species in hospital environment (Fig. 2 C, D). In the  
148 conditions of our basic scenario, *E. coli* populations (black) tend to prevail. *E. faecium*  
149 (violet) and *K. pneumoniae* (yellow-green) populations were maintained along the  
150 experiment. In the community, *E. coli* has a stronger dominance over other species, and  
151 similar dynamics occur as in the hospital, at slower rates.

152 *Klebsiella pneumoniae* (Fig SM3) is intrinsically resistant to AbA and, in our case, it  
153 harbors a plasmid encoding AbCR (CTX), and a mutation encoding AbFR (FLQ). In the  
154 hospital, the AbCR phenotype is readily selected. However, because of the high density  
155 of *E. coli* with the plasmid-mediated AbAR, several *Klebsiella* strains receive this  
156 plasmid. These *Klebsiella* strains have no benefit from this plasmid because they are  
157 intrinsically aminopenicillin-resistant, but incompatibility with the plasmid determining  
158 AbCR occurs, eliminating AbCR from the recipients and giving rise to the phenotype  
159 AbAR-AbFR (purple). That contributes to the decline in AbCR-containing phenotypes  
160 (olive green). In any case, the dominance of *E. coli* prevents a significant growth of *K.*  
161 *pneumoniae*. *Enterococcus faecium* (Fig SM3) is intrinsically resistant to AbC (AbCR,  
162 CTX), but there are two variants, one AbA (AMP) susceptible, and the other resistant,  
163 this last one has also AbFR. However, the AbAS variant can acquire the AbAR trait  
164 from the resistant one by (infrequent) horizontal genetic transfer and becomes an AbAR  
165 donor. There is replacement dynamics of AbAS by the AbAR phenotype.

**166Influence of baseline resistance composition on the dynamics of bacterial species.**

167The local evolution of antibiotic resistance can depend on the baseline composition of  
168susceptible and resistant bacterial populations (Fig 3). In a baseline scenario, we  
169consider a density of 8,600 h-cells (1 h-cell=100 identical cells, see the section  
170“quantitative structure of the basic model application” below) of *E. coli* of which 5,000  
171are susceptible, 2,500 have plasmid-mediated aminopenicillin-resistance (PL1-AbAR),  
1721,000 have fluoroquinolone resistance (AbFR), and 100 combines both resistances. To  
173mimic a “more susceptible scenario,” values were changed to 8,000 susceptible, 500  
174with PL1-AbAR, 50 with AbFR, and 50 with PL1-AbAR and AbFR. A higher  
175proportion of susceptible *E. coli* facilitates the increase of the more resistant organisms,  
176*K. pneumoniae* and AbAR *E. faecium*. Because of the selection of *K. pneumoniae* (olive  
177green) harboring cefotaxime-resistance (PL1-AbCR), and the ability of transfer of the  
178PL1 plasmid to *E. coli*, the proportion of *E. coli* with cefotaxime-resistance (mainly  
179light and dark blue) increases in the scenario with a lower resistance baseline for *E. coli*.  
180This example illustrates the hypothesis that a higher prevalence of resistance in the *E.*  
181*coli* component of the gut flora might reduce the frequency of other resistant organisms,  
182which might inspire interventions directed to restore susceptibility in particular species  
183(10, 11).

**184Single clone *E. coli* dynamics: influence of baseline resistances.** In the previous  
185analysis, subpopulations of *E. coli* were characterized by their antibiotic-resistance  
186phenotype (phenotype populations). Alternatively, we can follow the evolution of four  
187independent *E. coli* clones, each one tagged in the model with particular signals  
188(unrelated with AbR), Ecc0, EccA, EccF, EccAF (see Table 1), and starting with specific  
189resistance traits, allowing for the possibility that the frequency of these “ancestor  
190clones” may change through time within a clone by the gain or loss of a trait. Figure 4



191 shows the densities of these ancestor clones along time. The detail of sequential trait  
192 acquisition for each one of these clones is shown in Fig SM2. The fully susceptible *E.*  
193 *coli* clone (Ecc0) first acquires AbAR (red), and AbCR (green). The AbAR phenotype  
194 facilitates the capture by lateral gene transfer of AbCR (CTX), giving rise to the double  
195 AbAR-AbCR phenotype (light blue). The incorporation of AbF-R (violet, FLQ) in the  
196 fully susceptible clone occurs early, later in the AbAR population, so that the rise of the  
197 multi-resistant phenotype (dark blue) occurs later and again at low numbers. The  
198 presence of the AbAR trait in the clone at time 0 (EccA) increases the success of the  
199 clone, including the acquisition of AbFR, and the multi-resistant phenotype.  
200 Interestingly, the presence of AbFR (fluoroquinolones-R) at the origin (EccF), was  
201 critical to enhance the numbers of double-resistant and multi-resistant phenotypes. The  
202 clones that were more susceptible at the origin remain relatively stable in numbers,  
203 suggesting that clonal composition tends to level-off along the continued challenges  
204 under antibiotic exposure.

205 **Dynamics of mobile genetic elements and resistance traits.** We consider *E. coli*, *K.*  
206 *pneumoniae*, and *P. aeruginosa* as members of a "genetic exchange community" (12,13)  
207 for the plasmid PL1. In Fig. 5, we can compare the evolutionary advantage of the same  
208 resistance phenotypic trait (AbAR) when harbored in a plasmid, as in *E. coli* or in the  
209 chromosome, as in *K. pneumoniae*. The overall success of the plasmid PL1 (blue line)  
210 benefits from the fact that this mobile element is selected by two different antibiotics  
211 (AbA and AbC, resistance shown in red and green lines respectively). Interestingly,  
212 resistance to AbFR (violet) is selected from early stages of the experiment, and after  
213 4,000 steps it converges with the AbCR, a plasmid-mediated trait, meaning that this  
214 plasmid is maintained almost exclusively in strains harboring AbFR gene, similar to  
215 empirical findings (14,15). If the conjugation rate of PL1 was increased, the main effect

216would be the reduction in selection of *K. pneumoniae*, as the predominance of the PL1-  
217AbAR plasmid from the more abundant populations of *E. coli* tended to dislodge PL1-  
218AbCR from *K. pneumoniae* (results not shown).

## 219Dynamics under changing scenarios in the hospital and community 220compartments

221**Frequency of patient flow between hospital and community.** The frequency of  
222exchange of individuals between the hospital and the community (hospital admission  
223and discharge rates) influences the evolution of antibiotic resistance (Fig 6). This occurs  
224because sensitive bacteria enter the hospital with newly admitted patients from the  
225community (where resistance rates are low), and this “immigration” allows sensitive  
226bacteria to “wash out” resistant bacteria (16). Multi-resistant *E. coli* strains emerge  
227much earlier with decreased flow rates, as bacteria resistant to individual drugs have  
228more time to coexist and thus exchange resistances by gene flow, and because the length  
229of “frequent exposure” to different antibiotics increases, and consequently selection  
230(17). The effect of slow flow of patients to the community is a late reduction in multi-  
231resistance (AbAR-AbCR-AbFR) and earlier double resistances (AbAR-AbFR) and  
232(AbAR-AbCR). In the community compartment, however, multi-resistance increases  
233when the flow from the hospital is more frequent (4 h).

234**Frequency of patients treated with antibiotics.** The proportion of patients exposed to  
235antibiotics increases selection of antibiotic resistance (16). We analyzed this effect in  
236our model considering proportions of 20%-10%-5% of patients exposed to 7  
237consecutive days of antibiotic therapy, three doses per day (Fig 7). If a high proportion  
238(20%) of patients are treated, *E. coli* multi-resistance is efficiently selected, as well as  
239resistant *K. pneumoniae* and *E. faecium*. If this proportion is reduced to 10%, and

240 particularly to 5%, there is a strong reduction in the amount of resistant *E. coli* cells and  
241 the emergence of multi-resistant bacteria is delayed (individual resistance data not  
242 shown for these species). However, the evolution of *E. coli* towards more multi-  
243 resistance partially counteracts the selective advantage of these species, restricting their  
244 growth to some extent, even in the scenario of high density of treated patients.

245 **Frequency of bacterial transmission rates in the Hospital.** Transmission of bacteria  
246 (any type of bacteria, including commensals) among individuals in the hospital  
247 influences the spread of antibiotic resistance. The effect of transmission rates of 5%, and  
248 20% per hour was analyzed (Figure 8), expressing the proportion of individuals that  
249 acquire any kind of bacteria from another individual per hour. These rates might appear  
250 exceedingly high, indicating very frequent transmission between hosts, but we refer  
251 here to cross-colonization rate involving “any type of bacteria”. Normal microbiota  
252 transmission rates between hosts have never been measured, probably requiring a  
253 complex metagenomic approach (18). Differences in evolution of *E. coli* phenotypes  
254 comparing 10% and 20% of colonization rates are unclear; maybe 10% transmission  
255 produce full effects, and 20% does not add much more. The subtractive representation  
256 allows discernment of a global advantage for the multi-resistant phenotypes (AbAR-  
257 AbCR-AbFR) when the proportion of inter-host transmission rises from 5 to 20%. The  
258 mono-resistant AbAR phenotype tends to be maintained longer under low contagion  
259 rates. Note that multi-resistant phenotype “bursts” occur (dark blue spikes in the figure)  
260 also with low contagion rates (5% box in fig. 8), and “bursts” of less-resistant bacteria  
261 (red spikes) also occur in high contagion rates (20% box). It is to be noticed that the  
262 increase in cross-colonization rates favors not only the transmission of resistant  
263 populations, but also of the more susceptible ones, in a certain extent compensating the  
264 spread of the resistant phenotypes populations.

265**Size of transmitted bacterial load.** The absolute number of intestinal bacteria that are  
266transmitted from one host to another one is certainly a factor influencing the acquisition  
267of resistant (or susceptible) bacteria by the recipient. However, this number is extremely  
268difficult to determine, as it depends not only on the mechanism of transmission (19,20),  
269but also because the recipient might harbor bacterial organisms indistinguishable from  
270those that are transmitted (21). On the other hand, efficient transmission able to  
271influence colonic microbiota depends on the number of bacteria in the donor host, and  
272the colonizing ability of different bacteria, not only in the intestine, but also in  
273intermediate locations in the body, as probably the mouth or upper intestine (22). To  
274show the potential effect of different bacterial loads acting as inocula, we consider a  
275final immigrant population reaching the colonic compartment equivalent to 0.1%, 0.5%  
276and 1% of the donor microbiota. As in previous cases, the evolution of multi-resistance  
277favors *E. coli* (Fig SI4). Multi-resistant *E. coli* emerges earlier and reaches higher  
278counts in higher-count inocula, but less resistant strains are maintained because the  
279higher-count inocula also contain more susceptible bacteria.

280**Intensity of the effect of antibiotics on bacterial populations.** The question of the  
281relation of the “potency” (intensity of antibacterial activity) of antibiotics in relation  
282with the selection of resistance has been a matter of recent discussions (23, 24, 25, 26).  
283To illustrate the point, we changed the bactericidal effect of the antibiotics used in the  
284model. Clinical species were killed at rates of 30%-15% (reflecting population decrease)  
285the first and second hour of exposure respectively, and these rates were decreased to  
2867.5-3.75%. Note that these modest killing rates intend to reflect the diminished effect of  
287antibiotics in slow-growing clinical bacteria located in a complex colonic microbiome.  
288The more susceptible *E. coli* phenotypes are maintained for longer when the killing  
289intensity of antibiotics is lower; on the contrary, the multi-resistant phenotype emerges

290earlier and reaches higher numbers when the intensity of antibiotic action increases (Fig  
2919). Under high antibiotic intensity, there is also a (small) increase in the resistant *K.*  
292*pneumoniae* and *E. faecium* phenotypes. This experiment shows that a high rate of  
293elimination of the more susceptible bacteria favors the colonization by the more  
294resistant ones.

295**Intensity of the antibiotic effect on colonic microbiota.** The proportion of the colonic  
296microbiota killed by antibiotic treatment, and thus the size of the open niche for other  
297strains to multiply, constitutes an important factor in the multiplication of potentially  
298pathogenic bacteria, and hence facilitates acquisition (mutational or plasmid-mediated)  
299of resistance, and transmission to other hosts. In the basic model, reduction of the  
300population is 25% for AbA, 20% for AbC, and 10% for AbF; in an alternative scenario  
301these proportions were modified to 10%, 5% or 2% respectively. The result of this  
302change is impressive (Figure 10): not only the number of bacteria is reduced but the  
303evolution towards antibiotic resistance (EC) occurs at a slower rate, and even if the  
304proportion of resistance phenotypes steadily increases along time, its absolute number  
305does not grow, thus limiting host-to-host transmission.

306**Strength of antibiotic selection on resistance traits.** Strength of antibiotic selection is  
307an important parameter in evolutionary biology of antibiotic resistance (27). Our  
308computational model allows heuristic knowledge about the strength of selection of an  
309antibiotic for a particular resistance trait, considering how the resulting trend is (or not)  
310compatible with the observed reality. An example case is the unanswered question: -do  
311plasmid-mediated cefotaxime-resistance (AbCR) also provides protection against  
312aminopenicillins (AbAR)? Strains harboring TEM- or SHV-extended-spectrum beta-  
313lactamases hydrolyzing cefotaxime probably retain sufficient levels of aminopenicillin  
314hydrolysis to be selected by aminopenicillins. However, the phenotype cefotaxime-

315resistant/aminopenicillin-susceptible is rare in hospital isolates. In our model, this was  
316investigated providing different strengths of ampicillin (AbA) selection for a  
317cefotaxime-resistant phenotype (AbCR): no selection (0%), selection only in 10% of the  
318cases (10%), and full selection (100%). The results of the model (Fig SM5) show that if  
319ampicillin were able to select for cefotaxime-resistance the phenotype aminopenicillin-  
320susceptible and cefotaxime-resistant should be prevalent from early stages. This is not  
321what is observed in the natural hospital environment, suggesting that ampicillin is not a  
322major selector for cefotaxime-resistance.

323

## 324**Discussion**

325The rate of antibiotic resistance among bacterial species in a given environment is the  
326result of the interaction of biological elements within a framework determined by many  
327local variables, constituting a complex parameter space (28, 29, 30). There is a need to  
328consider (in an integrated way) how changes in these parameters might influence the  
329evolution of resistant organisms. This endeavor requires the application of new  
330computational tools that should consider the nested structure of the microbial  
331ecosystems, where mechanisms of resistance (genes) can circulate in mobile genetic  
332elements among bacterial clones and species belonging to genetic exchange  
333communities (12, 13) located in different compartments (as the hospital, or the  
334community). A number of different factors critically influence the evolution of this  
335complex system, such as antibiotic exposure (frequency of treated patients, drug  
336dosages, the strength of antibiotic effects on commensal bacterial communities, the  
337replication rate of the microbial organisms, as well as the fitness costs imposed by  
338antibiotic resistance, the rate of exchange of colonized hosts between compartments

339with different levels of antibiotic exposure (hospital and community), or the rates of  
340cross-transmission of bacterial organisms among these compartments. The challenge  
341that we are addressing in this work is to simultaneously combine for the first time all  
342these (and potentially more) factors in a single computing model to understand the  
343selective and ecological processes leading to the selection and spread of antibiotic  
344resistance. In comparison with available classic mathematical models that have been  
345applied to the study of evolution of antibiotic resistance (31), the one we are discussing  
346in this work is far more comprehensive in terms of the level of capture of the multi-level  
347parametric complexity of the phenomenon. Note that results obtained with the model  
348and presented here correspond only to a very limited number of possible “computational  
349experiments”, chosen to show the possibilities of the model, but a virtually unlimited  
350number of other experiments, with different combinations of parameters, are feasible *à*  
351*la carte* with a user-friendly interface. In addition, our model can illustrate principles,  
352generate hypothesis and guide and facilitate the interpretation of empirical studies (32,  
35333). Examples of these heuristic predictions are that resistance (less antibiotic effect) in  
354colonic commensal flora can minimize colonization by resistant pathogens, the possible  
355minor role of aminopenicillins in the selection of extended-spectrum beta-lactamases  
356(AbCR), or the possibility of the presence of plasmids containing aminopenicillin-  
357resistance in *K. pneumoniae*, phenotypically “invisible” as this organism has  
358chromosomal resistance to the drug.

359Our results are presented in terms of the ensemble of biological entities contained in the  
360whole landscape (for instance the hospital), aggregated across individual hosts. This  
361“pooling” approach, originated in ecological studies, has already been used in antibiotic  
362resistance (34). Environments (as the hospital) are depicted as single “big world” units  
363colonized by “big world populations”, including those with are antibiotic resistant but

364also the susceptible ones, which can limit the spread of resistance, in a sense “spreading  
365health” (35). In this scenario, how might antibiotics modify the available colonization  
366space? (36, 37). Our model includes the elimination of part of the global colonic  
367microbiota with antibiotic use, favoring the colonization of resistant organisms,  
368previously in minority.

369In our computational experiments we can reproduce the successive “waves” of  
370increasingly resistant phenotypes, mimicking the clonal interference phenomenon (38).  
371We show that the speed and intensity of this process depends on the global resistance  
372landscape and the density and phenotype of the bacterial subpopulations. Our model  
373predicts that previous mutational ciprofloxacin-resistance facilitates fast evolution of  
374multi-resistance by horizontal acquisition of resistance genes (14, 15). We also show  
375that the long-term dissemination of chromosomally-encoded genes is by far less  
376effective than the spread of traits encoded in transferable plasmids, even though some  
377limitations are detectable because of plasmid incompatibility. A frequently overlooked  
378aspect of antibiotic resistance suggested by our membrane computing experiments, is  
379that probably the evolution of multi-resistance favors at long term some predominant  
380species, as *E. coli*, where there is also an increasing benefit for the more resistant  
381clones.

382The consequences of changes in the transmission and treatment rates of the hospital and  
383the community were also explored in our model. Several mathematical models have  
384also investigated these changes (16, 37, 38, 39, 40, 41, 42, 43, 44, 45). Is clear that the  
385effect of reducing patient discharges and admissions in the hospital increases the local  
386rates of antibiotic resistance, but in our model, the proportion of antibiotic treated  
387patients in the hospital has the stronger effect, stressing the importance of a precision-  
388prescribed antibiotic therapy (44). The role of increasing rates of hospital cross-



389colonization also influences the rise of resistance, but this effect seems lower than  
390expected, probably because higher transmission rates also assures transmission of the  
391more susceptible antibiotic populations, a kind of “washing out” process of resistance,  
392as the one that occurs when the community-hospital flow increases (16). The model also  
393predicts that the “amount” of bacteria transmitted between hosts favors the ascent of  
394antibiotic resistance. We considered another frequently overlooked factor: the  
395consequences of “intensity” (aggressiveness) of the antibiotic therapy, because of  
396frequent dosage and particularly in terms of its ability to reduce the colonic microbiota,  
397and therefore “colonization resistance” for resistant opportunistic pathogens (47).

398Precise data are not always easy to obtain, and the type of mathematical or  
399computational models should influence the results of predictions (48). However,  
400because of the functional analogy of membrane computing with the biological world,  
401we hypothesize that the trends revealed in our computational model reflect general  
402processes in the evolutionary biology of antibiotic resistance. If the model were fed with  
403objective data extracted from a real landscape (which will be possible with a user-  
404friendly interface), it could provide a reasonable expectation of the potential  
405evolutionary trends in this particular environment and could support the adoption of  
406corrective interventions (49). Validation of this computational model is the next  
407necessary step; to this goal, we are developing an “experimental epidemiology” model  
408where the parameters could be altered and measured (50), and also planning prospective  
409hospital-based observations.

410Finally, we would like to stress that the type of membrane-computing model that was  
411applied in this work can be easily escalated or adapted to a variety of applications in  
412systems biology (51,52), and particularly to understand complex ecological systems  
413with nested hierarchical structures and involving microorganisms (53).

## 414 **Material and Methods**

415 **Software implementation and computing model.** All computational simulations were  
416 performed using an updated version of ARES (Antibiotic Resistance Evolution  
417 Simulator), which is the software implementation of a P system for modeling of  
418 antibiotic resistance evolution (8). This P system model works with objects and  
419 membranes distributed in different regions organized in a tree-like structure, as the P  
420 system classic model, but now with more specific rules: the “object rules” can modify  
421 an object (evolution rules) or move the object out, in, or between membranes, the  
422 “membrane rules” can move membranes out, in, or between regions that contain them  
423 as “object rules” and can dissolve and duplicate membranes. When a membrane is  
424 dissolved all the membranes and objects inside disappears. For duplication we can  
425 define which objects will be duplicated and which ones will be distributed; the  
426 membranes are always distributed. The implementation of our P system uses a  
427 stochastic to apply the rules, the rules being ordered by priorities and each rule has a  
428 “probability” to be applied. Other computational objects can be introduced, either to tag  
429 particular membranes, or to interact with the embedded membranes, for instance  
430 mimicking antibiotics, according to a set of pre-established rules and specifications. We  
431 obtain an evolutionary scenario including several types of nested computing membranes  
432 emulating entities such as: i) resistance genes, located in the plasmid, other conjugative  
433 elements or in the chromosome; ii) plasmids and conjugative elements transferring  
434 genes between bacterial cells; iii) bacterial cells; iv) microbiotas where different  
435 bacterial species and subspecies (clones) can meet; v) hosts containing the microbiotic  
436 ensembles; vi) environment(s) where the hosts are contained. The current version of  
437 ARES (2.0) that can be freely downloaded at [https://sourceforge.net/projects/ares-](https://sourceforge.net/projects/ares-simulator/)  
438 [simulator/](https://sourceforge.net/projects/ares-simulator/). ARES 2.0 runs in any computer (is a java application) albeit it is highly

439 recommendable to install it in at least a 4× 6 Core Server and 128 GB of RAM. The  
440 original ARES web site at <http://gydb.org/ares> offers sections with information about  
441 the rules and parameters currently used by ARES.

442 **Anatomy of the model application.** The current application of the model was  
443 structured accordingly with the following composition: 1) compartments containing  
444 individual hosts at particular densities, mimicking a hospital (H) and a community  
445 environment (C); flux of individuals between both compartments occurs at variable  
446 rates, mimicking admission or discharge from the hospital. 2) clinically relevant  
447 bacterial populations colonizing these hosts, from the species, Ec, *Escherichia coli*; Ef,  
448 *Enterococcus faecium*; Kp, *Klebsiella pneumoniae*, and Pa, *Pseudomonas aeruginosa*.  
449 These populations diversify from their initial phenotype by acquisition of mutations  
450 and/or mobile genetic elements, plasmids PL1 and for Ec, Kc, Pa circulating in these  
451 species, or, in Ef, conjugative elements (CO1). The cell can maintain two copies of the  
452 plasmid PL1 (containing resistance to AbA (PL1-AbAR) or AbC (PL1-AbCR) but not  
453 more, so that when a third plasmid PL1 enters the cell, one of the three is stochastically  
454 removed. AbCR produces some degree of resistance to AbA, and we consider this  
455 antibiotic also selects, in 10% of the cases, cells containing the plasmid PL1-AbCR.  
456 CO1 is an Ef “plasmid-like” mechanism of transfer of chromosomal gene AbAR (CO1-  
457 AbAR); a single copy of CO1-AbAR exist in the receiving host. Acquired resistance  
458 (not intrinsic) to AbA (AbAR) is mediated by the acquisition of PL1 (or CO1),  
459 resistance to AbC (AbCR), by acquisition of PL1 containing the AbCR resistance  
460 determinant, and resistance to AbF (AbFR) by mutation. Note that our representations,  
461 for example, when Ec0 (susceptible) receives PL1 with AbAR it becomes EcA, if PL1  
462 with AbCR becomes Ec2C, and when Ec0, Ec1 or Ec2 mutate to AbFR become EcF,

463EcAF3, and EcCF. The acquisition of PL1 with AbAR by EcCF or PL1 with AbCR by  
464EcAF produces the multi-resistant strain EcACF.

#### 465**Quantitative structure of the basic model application.**

466**Hospitalized hosts in the population.** The number of hosts in the hospital and  
467community environments reflects an optimal proportion of 10 hospital beds per 1,000  
468individuals in the community (<https://data.oecd.org/healthqt/hospital-beds.htm>). In our  
469model, the hospital compartment has 100 occupied beds, and corresponds to a  
470population of 10,000 individuals in the community.

471**The admission and discharge rates from hospital** are equivalent, 3-10  
472individuals/10,000 population/day (<http://www.cdc.gov/nchs/data/nhds/1general/>). In  
473the basic model, 6 individuals from the community are admitted to the hospital and 6  
474are discharged from the hospital to the community per day (approximately at 4 hour-  
475intervals). Patients are stochastically admitted or discharged, meaning that about 75% of  
476the patients stay in the hospital between 6 and 9 days.

477**The bacterial colonization space** of the populations of the clinical species considered  
478here (Table 1) and other basic colonic microbiota populations is defined as the volume  
479occupied by these bacterial populations. In natural conditions, the sum of these  
480populations was estimated in  $10^8$  cells per ml of the colonic content. Clinical species  
481constitute only 1% of the cells in each ml, and have a basal colonization space of 1% of  
482each ml of colonic content, 0.01 ml. In the next section is explained how these spaces  
483are considered for counting populations in the model.

484The ensemble of other microbiota populations is considered in our basic study model as  
485an ensemble surrounded by a single membrane. The colonic space occupied by these  
486populations can change because of antibiotic exposure. Along a treatment course (7

487days) the antibiotics AbA, AbC, and AbF reduce the intestinal microbiota 25%, 20%  
488and 10% respectively. As an example, if we consider that 10% of the basic colonic  
489populations were eliminated by antibiotic exposure, their now empty space (0.1 ml),  
490will be occupied by antibiotic resistant clinical populations, and by the colonic  
491populations that have survived the challenge. In the absence of antibiotic exposure, the  
492colonic populations are restored in two months to their original population size. Clinical  
493populations are comparatively faster in colonizing the empty space.

494**Populations' operative packages and counts.** To facilitate the process of model  
495running, we consider that  $10^8$  cells in nature is equivalent to  $10^6$  cells in the model. In  
496other words, one “hecto-cell” (h-cell) in the model is an “operative package” of 100  
497cells in the real world. Because of the very high effective population sizes in bacteria,  
498these 100 cells are considered as a uniform population of a single cell type. A certain  
499increase in stochasticity might occur because of using h-cells; however, run replicates  
500do not differ significantly (fig SM1). Also for computational efficiency, we considered  
501that each patient (in hospital) or individual (in the community compartment) is  
502represented in the model by 1 ml of its colonized colonic space (about 3,000 ml) and is  
503referred as a “host-ml”. Consequently, in most of the figures we represent our results as  
504“number of h-cells in all hosts-ml”.

505**Quantitative distribution of clinical species and clones.** In the basal scenario, the  
506distribution of species in these 1,000,000 cells, contained in 1 ml, is the following: for  
507EC, 860,000 cells, including 500,000 susceptible cells, 250,000 containing PL1-AbAR,  
508100,000 with the AbFR mutation, and 10,000 with both PL1-AbAR and AbFR  
509mutation; for EF, 99,500 AbA susceptible and 20,000 AbAR. For KP, 20,000, with  
510chromosomal AbAR, PL1-AbCR and AbFR; and PA, 500 containing PL1-AbCR. At  
511time 0, this distribution is identical in hospitalized and community patients.

512 **Tagging starting clone populations in *E. coli*.** To be able to follow the evolution of  
513 particular lineages inside *E. coli*, four ancestral clones (Ecc) were distinguished,  
514 differing in the original resistance phenotype, Ecc0 as a fully susceptible clone, EccA  
515 harboring PL1 determining AbAR, EccF harboring AbFR, and with EccAF with PL1-  
516 AbAR, and AbFR (Table 1). At time 0 each one of these clones is tagged with a  
517 distinctive “object” in the model which remains fixed to the membrane, multiplies with  
518 the membrane, and is never lost. Each one of the daughter membranes along the  
519 progeny can alter its phenotype by mutation or lateral gene acquisition, but the ancestral  
520 clone will remain detectable.

521 **Multiplication rates.** We consider the basal multiplication rate (=1) the one  
522 corresponding to Ec0, where each bacterial cell gives rise to two daughter cells every  
523 hour. Comparatively, Ef=0.85, Kp=0.9, and Pa=0.15. The acquisition of a mutation,  
524 plasmid of a mobile element imposes an extra cost of 0.03. Therefore, Ec0=1,  
525 EcA=0.97 (because of the cost of PL1-AbAR), EcC=0.97 (cost of PL1-AbCR), EcF=  
526 0.97 (cost of mutation); EcAF=0.94 (PL1-AbAR and AbFR), Ef(1)=0.85, Ef(2)=0.79  
527 (CO1-AbAR and AbFR), Kp=0.84 (PL1-AbAR and AbFR), and Pa with PL1-AbCR  
528 =0.12 (PL1-AbCR). The number of cell replications will be limited by the available  
529 space (see above).

530 **Transfer of bacterial organisms from one host to another one** is expressed by the  
531 proportion of individuals that can stochastically produce an effective transfer of  
532 commensal or clinical, susceptible or resistant bacteria to another one (contagion index,  
533 CI). If contagion is 5%, or CI=5, that means that from 100 patients, 5 “donors” transmit  
534 bacteria to 5 others “recipients” per hour. In the case of the basic scenario, CI=5 in the  
535 hospital and CI=1 in the community (all results with CI=0.01 are available on request).  
536 In the basic scenario, donors contribute to the colonic microbiota of recipient

537 individuals with 0.1, 0.5 and 1% of their own bacteria. This inoculum does not  
538 necessarily reflect the number of cells transferred, but also reflects endogenous  
539 multiplication after transfer, as proposed in other models (54). In any case, cross-  
540 transmission is responsible for most new acquisitions of pathogenic bacteria (55).

541 **Frequency of plasmid transfer between bacteria** occurs randomly and reciprocally at  
542 an equivalent high frequency among Ec and Kp; in the basic model, the rate is 0.0001,  
543 one effective transfer occurring in 1 of 10,000 potential recipient cells. Plasmid transfer  
544 occurs at a lower rate, of 0.000000001 in the interactions of Ec and Kp with Pa.  
545 Conjugative-elements) mediated transfer of resistance among Ef occurs at a frequency  
546 of 0.0001, but Ef are unable to receive or donate resistance genes to any of the other  
547 bacteria considered. In the case of Ec and Kp plasmids we consider plasmid limitation  
548 in the number of accepted plasmids, so that if a bacterial cell with two plasmids receives  
549 a third plasmid, there is a stochastic loss of one of the residents or the incoming  
550 plasmid, but all three cannot coexist in the same cell.

551 **Mutational resistance** is only considered in the present version of the model for  
552 resistance to AbF, fluoroquinolones. Organisms of the model-targeted populations  
553 mutate to AbF at the same rate, 1 mutant every  $10^8$  bacterial cells per cell division.

554 **Antibiotic exposure.** In the basic model, 5%-10%-20% of the individuals in the  
555 hospital compartment are under antibiotic exposure each day, each individual being  
556 exposed (treated) for 7 days. In the community compartment 1.3 % of individuals are  
557 under treatment, also exposed each of them to antibiotics for 7 days. Antibiotics AbA-  
558 AbC-AbF are used in hospital and the community compartments at a proportion  
559 (percentage) of 30-40-30; and 75-5-20 respectively. In the basic scenario a single patient  
560 treated with only one antibiotic, administered every 8 hours.

561 **Intensity of the effect of antibiotics on susceptible clinical populations.** After each  
562 dose administered, all three (bactericidal) antibiotics induce after a decrease of 30% in  
563 the susceptible population after the first hour of dose exposure, and 15% in the second  
564 hour. These relatively modest bactericidal effects reflect the reduction in antibiotic  
565 killing rates of clinical populations when inserted in the colonic microbiota. The  
566 antibiotic stochastically penetrates in these percentages of bacterial cells, and those that  
567 are susceptible are removed (killed). Therapy is maintained in the treated individual  
568 along 7 days.

569 **Intensity of the effect of antibiotics on colonic microbiota.** Antibiotics exert an effect  
570 reducing the density of the colonic commensal microbiota, resulting in free-space and  
571 nutrients that can benefit the clinical populations. In the basic model, such reduction is  
572 25% for AbA, 20% for AbC, and 10% for AbF.

573

574 **Author contributions:** FB, CLL, JMS, MC designed the research; MC and FB  
575 performed the research; FB, MC, AM, FN, TMC, RC analyzed data; CLL, JMS, MC,  
576 RC, RF, FN, and VFL provided computing services, FB and MC wrote the paper.

577 **Conflict of interest statement:** The authors declare no conflict of interests.

578 **Acknowledgements.** This work was supported by the European Commission, Seven  
579 Framework Program (EVOTAR, FP7-HEALTH- 282004) to FB, TMC, VFL, MC; the  
580 Instituto de Salud Carlos III of Spain (Plan Estatal de I+D+i 2013-2016, grant PI15-  
581 00818; CIBERESP, grant CB06/02/0053) to F.B., the Regional Government of Madrid  
582 (InGEMICS-C, S2017/BMD-3691) to TC and FB, SAF2015-65878-R (MINECO,  
583 Spain) and PrometeoII/2014/065 (Generalitat Valenciana, Spain) to AM, all co-financed  
584 by the European Development Regional Fund, "A Way to Achieve Europe" (ERDF).



585

## 586 **Figure Legends**

587 **Figure 1.** Dynamics of bacterial resistance phenotypes in *E. coli*. Pink, susceptible; red,  
588 AbAR (AMP); violet, AbFR (FLQ); brown, AbAR and AbFR; light blue, AbAR and  
589 AbCR; dark blue, AbAR, AbCR and AbFR; light green, AbCR; olive green, AbCR and  
590 AbFR. In ordinates, number of hecto-cells (h-cells, packages of 100 identical cells) in  
591 all hosts-ml (each host represented by 1 ml of colonic content); in abscissa, time (1000  
592 steps, roughly equivalent to 42 days).

593 **Figure 2.** Comparative dynamics of *E. coli* phenotypes in the hospital (A), and the  
594 community (B); axes and color code, as in Fig 1. Species dynamics in the hospital (C)  
595 and the community (D): *E. coli* (black), *K. pneumoniae* (yellow green), *E. faecium*  
596 AbAS (violet), and *E. faecium* AbAR (dark green). *P. aeruginosa* is not visible in this  
597 representation (low numbers).

598 **Figure 3.** Influence of baseline *E. coli* resistance phenotypes composition on the  
599 dynamics of bacterial species. On the left, comparative dynamics of *E. coli* phenotypes  
600 in the basic hospital scenario (up) and with reduced numbers of resistant phenotypes  
601 (down). Colors and axes, as in Fig. 1. On the right, comparative dynamics of bacterial  
602 species in the basic model (up), and the reduced basal resistances (down); colors as in  
603 Fig 2.

604 **Figure 4.** Single clone *E. coli* dynamics in the hospital: influence of baseline  
605 resistances. In pink, clone Ecc0 starting with full susceptibility, in red, with AbAR  
606 (EccA); in violet, with AbFR (EccF); in brown, with AbAR and AbFR (EccAF).

607 **Figure 5.** Dynamics of a plasmid and resistance traits in the hospital environment. The  
608 species *E. coli*, *K. pneumoniae* and *P. aeruginosa* are included as a genetic exchange

609community. In blue, total number of the plasmid PL1; in bright red, plasmid PL1 with  
610the gene AbAR (AMP); in green, PL1 with AbCR (CTX); in violet, chromosomal AbFR  
611(FLQ) gene; in red-brown, chromosomal AbAR (as in *K. pneumoniae*). In ordinates,  
612number of plasmids or resistance traits in h-cells (packages of 100 identical cells) in all  
613hosts-ml (each host represented by 1 ml of colonic content).

614**Figure 6.** Influence of patients' flow between hospital and community. On the left,  
615influence on *E. coli* resistance phenotypes in the hospital when one patient is admitted  
616at/discharged from the hospital every 2 (top), 4 (middle), or 8 hours (bottom).

617**Figure 7.** Influence of the frequency of patients treated with antibiotics. On the left, *E.*  
618*coli* phenotypes when 20% (up), 10% (mid) or 5% (down) of patients receive antibiotics  
619during a week, three doses per day. In the right part, effect on bacterial species. Colors  
620as in Figs 1 and 2.

621**Figure 8.** Influence of the frequency of bacterial cross-transmission rates in the  
622hospital. On the left, dynamics of *E. coli* phenotypes when bacterial exchanges between  
623patients occur in 5% (up) or 20% (down) per hour. A subtractive representation is  
624provided below (5 vs. 20%). On the right, influence on the species composition: 5%  
625(up), and 20% (down). Colors as in Figs 1 and 2.

626**Figure 9.** Influence of the activity of the antibiotic on *E. coli* phenotypes (left) and the  
627species composition (right). Upper panels, susceptible bacteria are eliminated 30% after  
628the first hour of exposure and 15% after the second hour; in the lower panels, the  
629elimination is lower, 7.5% the first hour and 3.75% the second hour. Colors as in Figs 1  
630and 2.

631**Figure 10.** Influence of the intensity of the antibiotic effect on colonic microbiota of  
632patients in the hospital. On the left, effects on *E. coli* phenotype of a reduction in

633microbiota of 25% for AbA, 20% for AbC, and 10% for AbF (upper panel); these values  
634were reduced to 10%, 5% or 2% respectively (lower panel). The effects on the species  
635composition is shown at the right side.

636

### 637**Figures (Supplementary material)**

638**Figure SM1.** Three consecutive model iterations, in the three panels of the figure,  
639representing the dynamics of *E. coli* resistance phenotypes in the hospital compartment.  
640As the model include several stochastic and probabilistic steps, the results obtained are  
641not entirely identical in replicated runs of the program. However, there are extremely  
642close.

643**Figure SM2.** Dynamics of *E. coli* clones starting with different resistance phenotypes in  
644the hospital compartment. On the left half, from top to down, Ecc0 starting without  
645resistance, EccA starting with AbAR; EccF starting with AbFR, and EccAF with AbAR  
646and AbFR. On the right half of the figure, the same in logarithmic representation,  
647allowing to perceive minority phenotypes.

648**Figure SM3.** Dynamics of *K. pneumoniae* (top), susceptible *E. faecium* Ef(1) (middle)  
649and Ef(2) AbAR (bottom) in the hospital and community (left and right columns  
650respectively). **Figure SM4.** Influence of the size of transmitted bacterial load. On the  
651left half of the figure, *E. coli* phenotypes dynamics in the hospital, when the mean  
652transmitted bacterial load is equivalent to 0.1% (up), 0.5% (mid) or 1% (bottom) of the  
653colonic microbiota. On the right side, evolution of the different species with these  
654transmission loads. Color codes as in Fig 1 and 2.

655**Figure SM5.** Expected dynamics of hospital-based *E. coli* under the hypothesis that  
656AbCR might provide: 0% of resistance to AbA (upper panel), 10% (mid panel), or  
657100% (lower panel). Colors as in Fig 1.

## 658**REFERENCES**

6591. Baquero F. 2004. From pieces to patterns: evolutionary engineering in bacterial  
660pathogens. *Nat Rev Microbiol* 2:510–518.

6612. Baquero F, Tedim AS, Coque T. 2013. Antibiotic resistance shaping multi-level  
662population biology of bacteria. *Front Microbiol* 4:15.

6633. Cantón R, Ruiz-Garbajosa P. 2011. Co-resistance: an opportunity for the bacteria and  
664resistance genes. *Curr Opin Pharmacol.* 11:477-485.

6654. Baquero F, Coque TM. 2011. Multilevel population genetics in antibiotic resistance.  
666*FEMS Microbiol Rev* 35:705-706.

6675. Günther F, Folke C. 1993. Characteristics of nested living systems. *J Biol Syst* 1:257-  
668274

6696. Păun Gh . 2000. Computing with membranes. *J Comp Syst Sci* 61:108–143

6707. Frisco P, Gheorghe M, Pérez-Jiménez MJ. 2014. Applications of Membrane  
671Computing to Systems and Synthetic Biology. Springer, Heidelberg.

6728. Campos M, Llorens C, Sempere J M, Futami R, Rodriguez I, Carrasco P, Capilla R,  
673Latorre A, Coque TM, Moya A, Baquero, F. 2015. A membrane computing simulator of  
674trans-hierarchical antibiotic resistance evolution dynamics in nested ecological  
675compartments (ARES). *Biol Direct* 10:41.

6769. Baquero F. Transmission as a basic process in microbial biology. 2017. Lwoff Award  
677Prize Lecture. FEMS Microbiol Rev. **41**:816-827.

67810. Baquero F, Coque T M, de la Cruz F. 2011. Ecology and evolution as targets: the  
679need for novel eco-evo drugs and strategies to fight antibiotic resistance. Antimicrob  
680Agents Chemother. **55**:3649-3660

68111. Baquero F, Martínez JL. 2017. Interventions on Metabolism: Making Antibiotic-  
682Susceptible Bacteria. mBio **8**: e01950-17.

68312. Fondi M, Karkman A, Tamminen MV, Bosi E, Virta M, Fani R, Alm EJ, McInerney  
684JO. 2016. “Every gene is everywhere but the environment selects”: global  
685geolocalization of gene sharing in environmental samples through network analysis.  
686Genom Biol Evol. **8**:1388-1400.

68713. Smillie CS, Smith MB, Friedman J, Cordero OX, David LA, Alm EJ. 2011. Ecology  
688drives a global network of gene exchange connecting the human microbiome. Nature,  
689480:241-244

69014. Fuzi M. 2016. Dissimilar fitness associated with resistance to fluoroquinolones  
691influences clonal dynamics of various multiresistant bacteria. Front Microbiol. **7**:1017.

69215. Fuzi M, Szabo D, Cserecsik R. 2017. Double-Serine Fluoroquinolone Resistance  
693Mutations Advance Major International Clones and Clone Clones of Various Multi-Drug  
694Resistant Bacteria. Front Microbiol. **8**:2261.

69516. Lipsitch M, Bergstrom CT, Levin BR. 2000. The epidemiology of antibiotic  
696resistance in hospitals: paradoxes and prescriptions. Proc Natl Acad Sci U S A **97**: 1938-  
6971943.

69817. Lehtinen S, Blanquart F, Croucher NJ, Turner P, Lipsitch M, Fraser, C. 2017.

699Evolution of antibiotic resistance is linked to any genetic mechanism affecting bacterial

700duration of carriage. Proc Natl Acad Sci U S A 114, 1075-1080.

70118. Lanza, V. F., Baquero F, Martinez, JL, Ramos-Ruiz R, Gonzalez-Zorn B, Andremont

702A, Sánchez-Valenzuela A, Ehrlich SD, Kennedy S, Ruppé E, van Schaik W, Willems RJ,

703de la Cruz F, Coque TM. 2018. In-depth resistome analysis by targeted metagenomics.

704Microbiome 6:11.

70519. Woolhouse M. 2017. Quantifying Transmission. Microbiol Spectr. 5(4). doi:

70610.1128/microbiolspec.MTBP-0005-2016.

70720. del Campo R, Sánchez-Díaz AM, Zamora J, Torres C, Cintas LM, Franco, E, Cantón

708R, Baquero F. 2014. Individual variability in finger-to-finger transmission efficiency of

709*Enterococcus faecium* clones. Microbiologyopen 3:128-132.

71021. Faith JJ, Colombel JF, Gordon JI. 2015. Identifying strains that contribute to

711complex diseases through the study of microbial inheritance. Proc Natl Acad Sci U S A

7122015 112:633-640.

71322. Bik EM, Eckburg PB, Gill SR, Nelson KE, Purdom EA, Francois F, Perez-Perez G,

714Blaser MJ, Relman DA. 2006. Molecular analysis of the bacterial microbiota in the

715human stomach. Proc Natl Acad Sci U S A 103:732-737.

71623. Huijben S, Bell AS, Sim DG, Tomasello D, Mideo N, Day T, Read AF. 2013.

717Aggressive chemotherapy and the selection of drug resistant pathogens. PLoS Pathog.

7182013; 9:e1003578. doi: 10.1371/journal.ppat.1003578

71924. Day T, Read AF. 2016. Does high-dose antimicrobial chemotherapy prevent the

720evolution of resistance? PLoS Comput Biol. 12(1), doi: 10.1371/journal.pcbi.1004689

72125. Kouyos RD, Metcalf CJE, Birger R, Klein EY, zur Wiesch PA, Ankomah, P,  
722Arinaminpathy N, Bogich TL, Bonhoeffer S, Brower C, Chi-Johnston G, Cohen T, Day  
723T, Greenhouse B, Huijben S, Metlay J, Mideo N, Pollitt LC, Read AF, Smith DL,  
724Standley C, Wale N, Grenfell B. 2014. The path of least resistance: aggressive or  
725moderate treatment? *Proc Biol Sci.* 281:20140566. doi: 10.1098/rspb.2014.0566.
72626. Kouyos RD, zur Wiesch PA, Bonhoeffer S. 2011. On being the right size: the impact  
727of population size and stochastic effects on the evolution of drug resistance in hospitals  
728and the community. *PLoS Pathog.* 7(4), doi: 10.1371/journal.ppat.1001334
72927. Oz T, Guvenek A, Yildiz S, Karaboga E, Tamer YT, Mumcuyan N, Ozan VB,  
730Senturk GH, Cokol M, Yeh P, Toprak E. 2014. Strength of selection pressure is an  
731important parameter contributing to the complexity of antibiotic resistance evolution.  
732*Mol Biol Evol.* 2014; 31:2387-2401.
73328. Martínez JL, Baquero F. 2014. Emergence and spread of antibiotic resistance:  
734setting a parameter space. *Ups J Med Sci.* 119: 68-77.
73529. Baym M, Lieberman TD, Kelsic ED, Chait R, Gross R, Yelin I, Kishony R. 2016.  
736Spatiotemporal microbial evolution on antibiotic landscapes. *Science* 353: 1147-1151.
73730. Hermsen R, Hwa T. 2010. Sources and Sinks: A stochastic model of evolution in  
738heterogeneous environments. *Phys Rev Lett.* 2010; 105:248104.
73931. Coen P. 2012. Models of Hospital Acquired Infection. In: *Infection Control –*  
740*Updates*, Sudhakar C. (ed). InTech, Publishers, London; pp.39-64
74132. Chow SJ. 2011. Heuristics, concepts, and cognitive architecture: toward  
742understanding how the mind works. *Electronic Thesis and Dissertation Repository*, 128.  
743<https://ir.lib.uwo.ca/etd/128>

74433. Levin BR, Baquero F, Ankomah PP, McCall IC. 2017. Phagocytes, Antibiotics, and  
745Self-Limiting Bacterial Infections. Trends Microbiol. 25:878-892

74634. Schmidt GV, Møllerup A, Christiansen LE, Ståhl M, Olsen JE, Angen Ø. 2015.  
747Sampling and pooling methods for capturing herd level antibiotic resistance in swine  
748feces using qPCR and CFU approaches. PLoS One 10(6) doi:  
74910.1371/journal.pone.0131672

75035. Browne HP, Neville BA, Forster SC, Lawley TD. 2017. Transmission of the gut  
751microbiota: spreading of health. Nat Rev Microbiol 15:531-543.

75236. Dall'Antonia M, Coen PG, Wilks M, Whiley A, Millar M. 2005. Competition  
753between methicillin-sensitive and-resistant *Staphylococcus aureus* in the anterior nares.  
754J Hosp Infect. 61:62-67.

75537. Austin DJ, Anderson RM. 1999. Transmission dynamics of epidemic methicillin-  
756resistant *Staphylococcus aureus* and vancomycin-resistant enterococci in England and  
757Wales. J Infect Dis.179:883-891.

75838. Gerrish, PJ, Lenski, RE. 1998. The fate of competing beneficial mutations in an  
759asexual population. Genetica 102-103:127-144.

76039. Austin, DJ, Anderson, RM. 1999. Studies of antibiotic resistance within the patient,  
761hospitals and the community using simple mathematical models. Philos Trans R Soc  
762Lond B Biol Sci. 354:721-738.

76340. Webb GF, D'Agata EM, Magal P, Ruan S. 2005. A model of antibiotic-resistant  
764bacterial epidemics in hospitals. Proc Natl Acad Sci U S A 102:13343-13348.



76541. D'Agata, EM, Magal P, Olivier D, Ruan S, Webb, GF. 2007. Modeling antibiotic  
766resistance in hospitals: the impact of minimizing treatment duration. *J Theor Biol.* 249:  
767487-499.

76842. D'Agata EM, Dupont-Rouzeyrol M, Magal P, Olivier D, Ruan, S. 2008. The impact  
769of different antibiotic regimens on the emergence of antimicrobial-resistant bacteria.  
770PLoS One 3(12) doi: 10.1371/journal.pone.0004036

77143. Haber M, Levin BR, Kramarz P. 2010. Antibiotic control of antibiotic resistance in  
772hospitals: a simulation study. *BMC Infect Dis* 10:254. doi: 10.1186/1471-2334-10-254.

77344. Bonhoeffer S, Lipsitch M, Levin BR. 1997. Evaluating treatment protocols to  
774prevent antibiotic resistance. *Proc Natl Acad Sci U S A* 94:12106-12111.

77545. Bonten MJ, Austin DJ, Lipsitch M. 2001. Understanding the spread of antibiotic  
776resistant pathogens in hospitals: mathematical models as tools for control. *Clin Infect*  
777*Dis.* 33:1739-1746.

77846. Levin BR, Baquero F, Johnsen PJ. 2014. A model-guided analysis and perspective  
779on the evolution and epidemiology of antibiotic resistance and its future. *Curr Opin*  
780*Microbiol.* 19:83-89.

78147. Mullineaux-Sanders C, Suez J, Elinav E, Frankel G. 2018. Sieving through gut  
782models of colonization resistance. *Nat Microbiol.* 3:132-140

78348. Spicknall IH, Foxman B, Marrs CF, Eisenberg JN. 2013. A modeling framework for  
784the evolution and spread of antibiotic resistance: literature review and model  
785categorization. *Am J Epidemiol.* 178:508-520.

78649. Baquero F, Lanza VF, Cantón R, Coque TM. 2015. Public health evolutionary  
787biology of antimicrobial resistance: priorities for intervention. *Evol Appl* 8:223-239.

78850. Llop P, Latorre A, Moya A. 2018. Experimental epidemiology of antibiotic  
789resistance: looking for an appropriate animal model system. *Microbiology spectrum*,  
7906(1)

79151. Colomer MA, Margalida A, Sanuy D, Pérez-Jiménez MJ (2011). A bio-inspired  
792computing model as a new tool for modeling ecosystems: The avian scavengers as a  
793case study. *Ecological modelling*, 222: 33-47.

79452. Romero-Campero FJ, Pérez-Jiménez MJ (2008). A model of the Quorum Sensing  
795System in *Vibrio fischeri* using P systems. *Artificial Life*, 14:95-109

79653. Romero-Campero FJ, Pérez-Jiménez MJ (2008). Modelling gene expression control  
797using P systems: The Lac Operon, a case study. *BioSystems*, 91, 3:438-457

79854. Bootsma MCJ, Bonten MJ, Nijssen S, Fluit AC, Diekmann O. 2007. An algorithm  
799to estimate the importance of bacterial acquisition routes in hospital settings. *Am J*  
800Epidemiol. 166:841-851.

80155. Wingart E, Shlaes JH, Mortimer EA, Shlaes DM. 1993. Evidence for nursing hand  
802mediated transmission of trimethoprim-resistant Gram negative bacilli on a nursing  
803home. *Clinical Infect Dis* 16:75-81.

804

## Figure 1

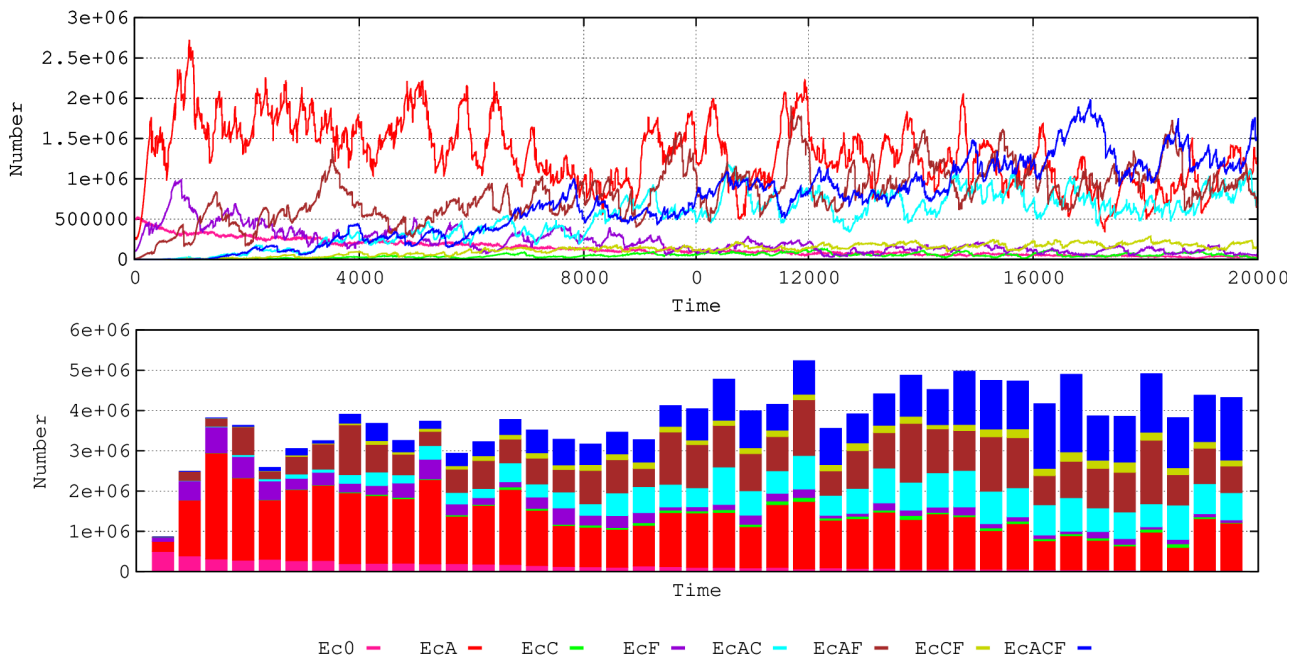

## Figure 2

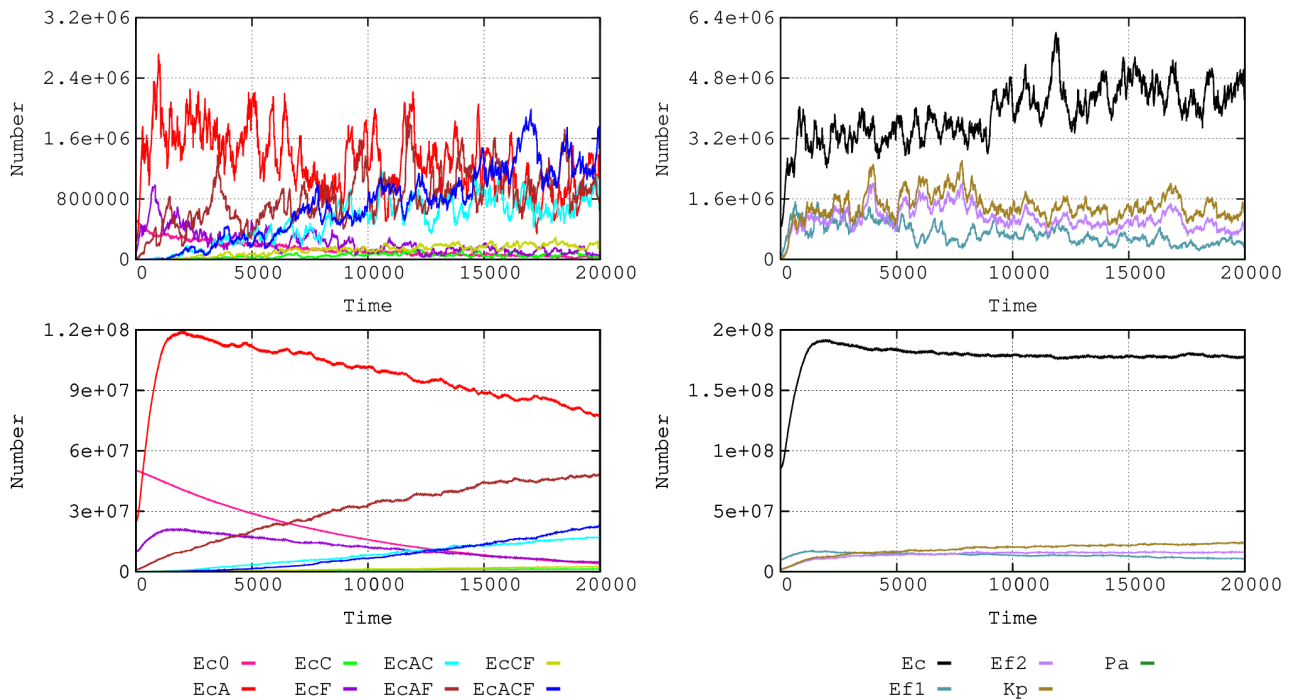

## Figure 3

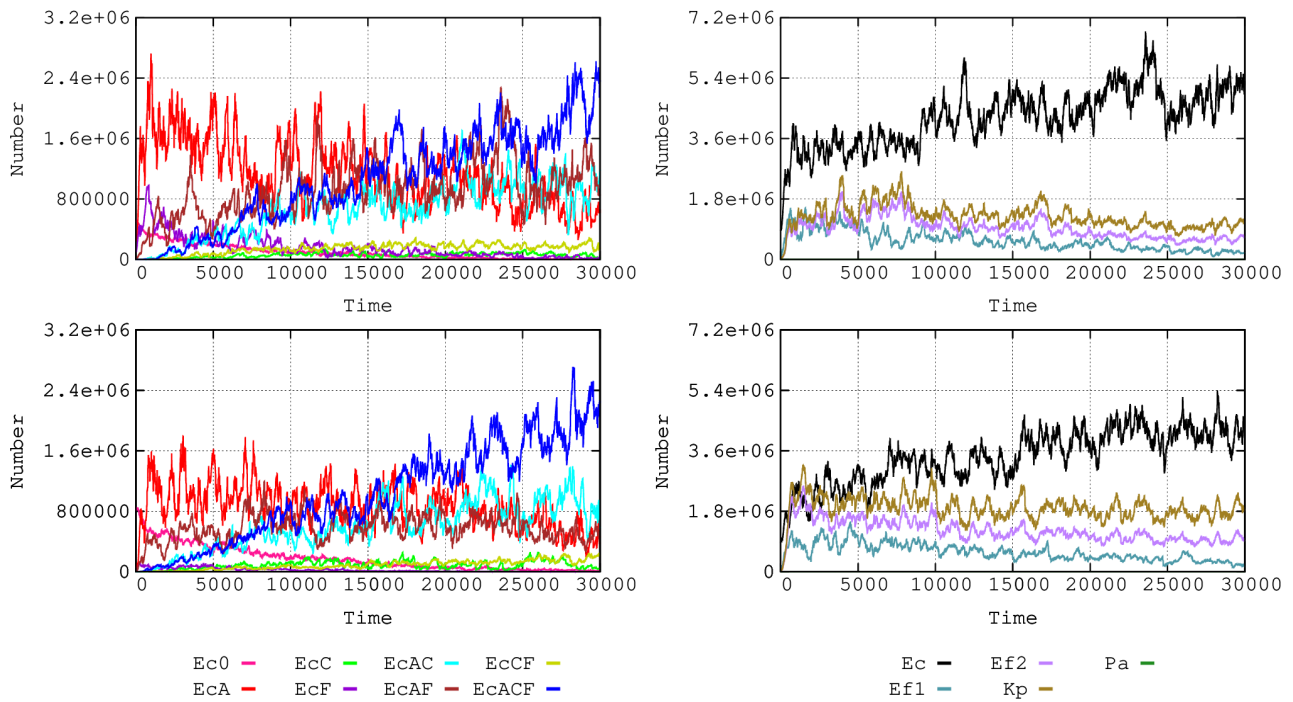

## Figure 4

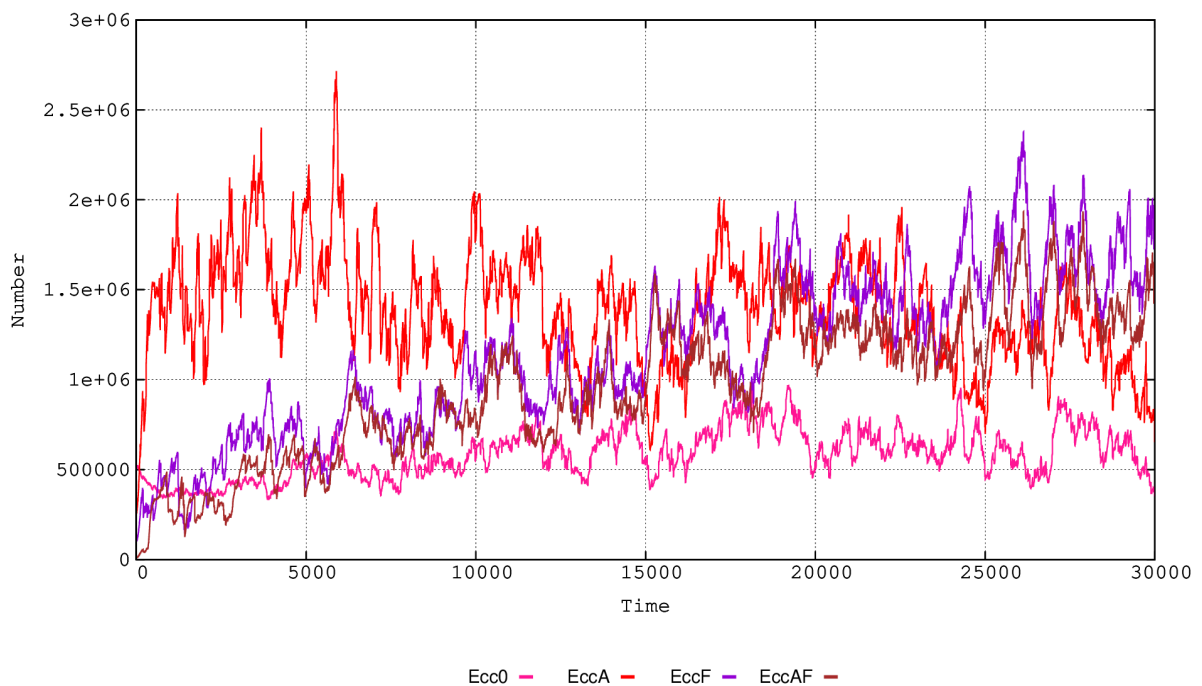

## Figure 5

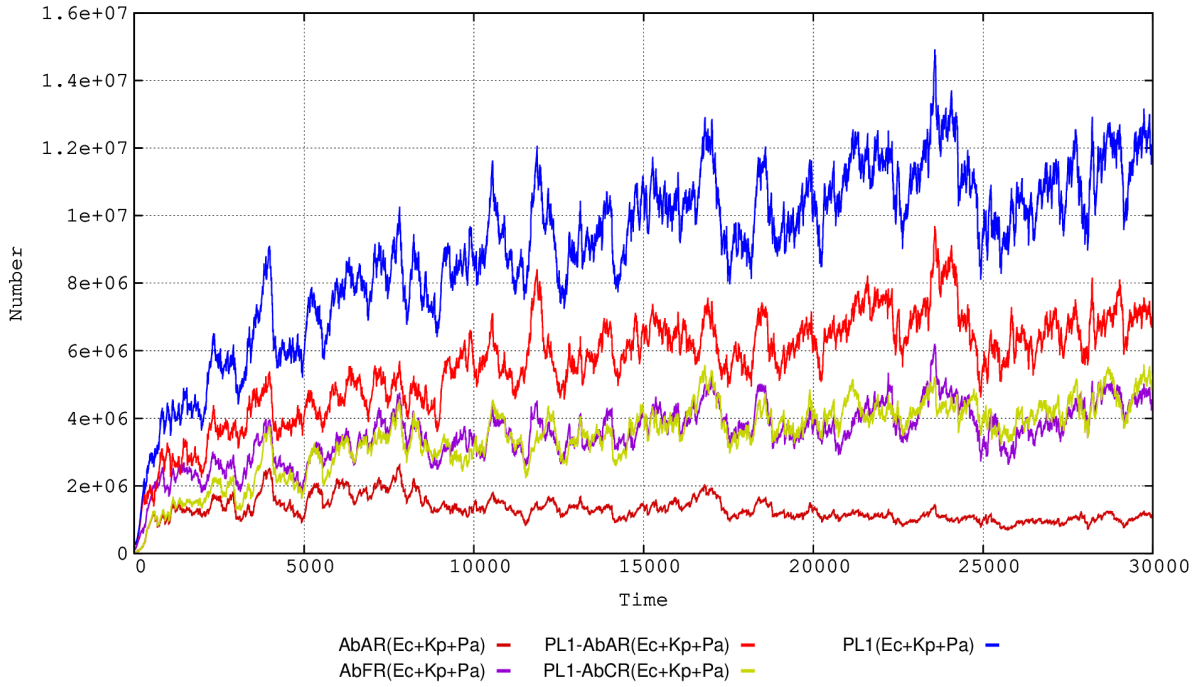

## Figure 6

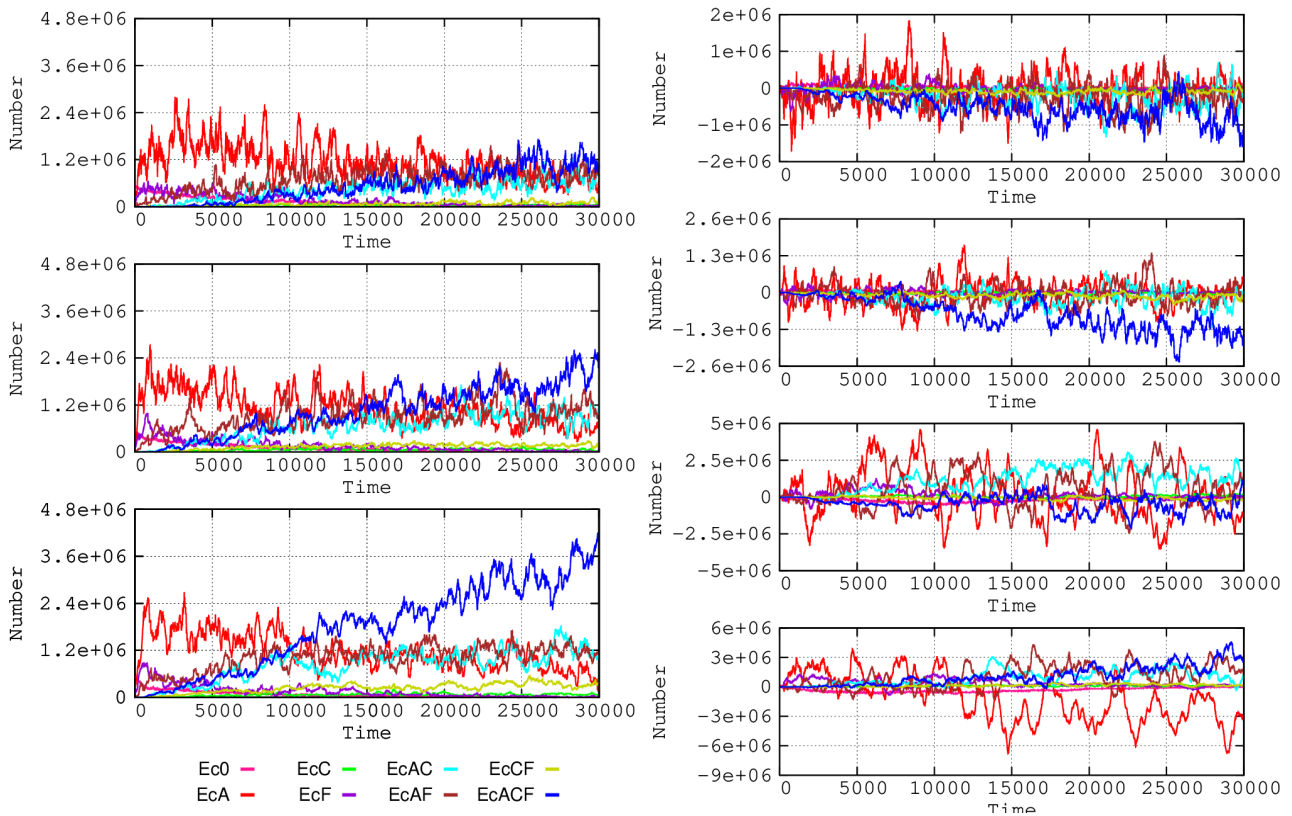

## Figure 7

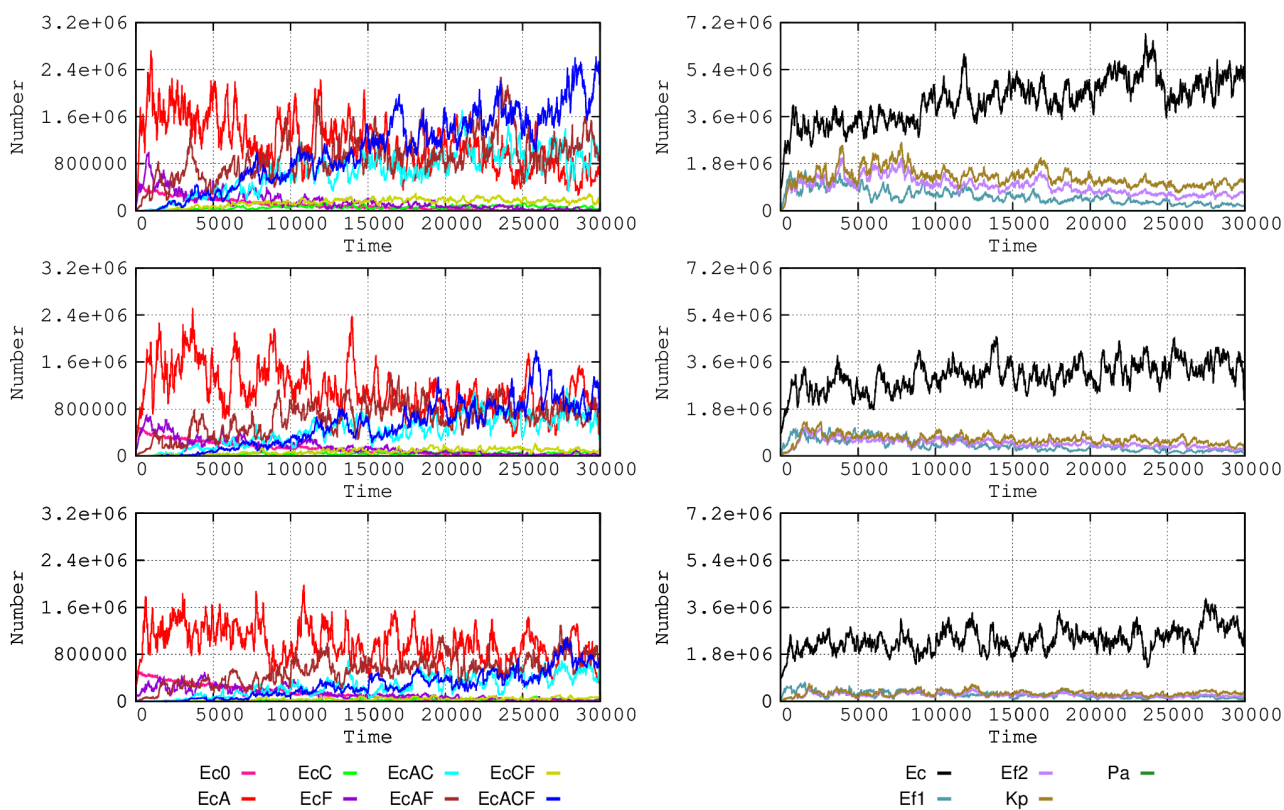

## Figure 8

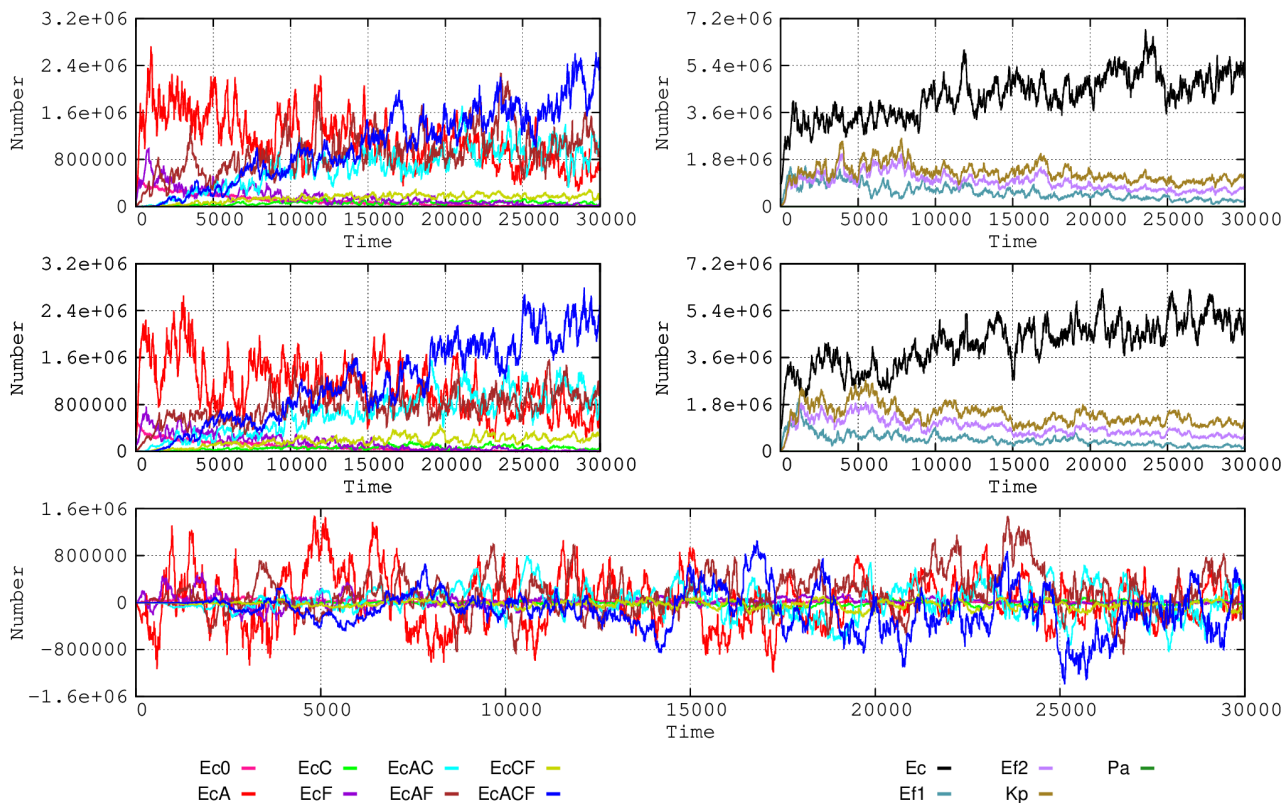

## Figure 9

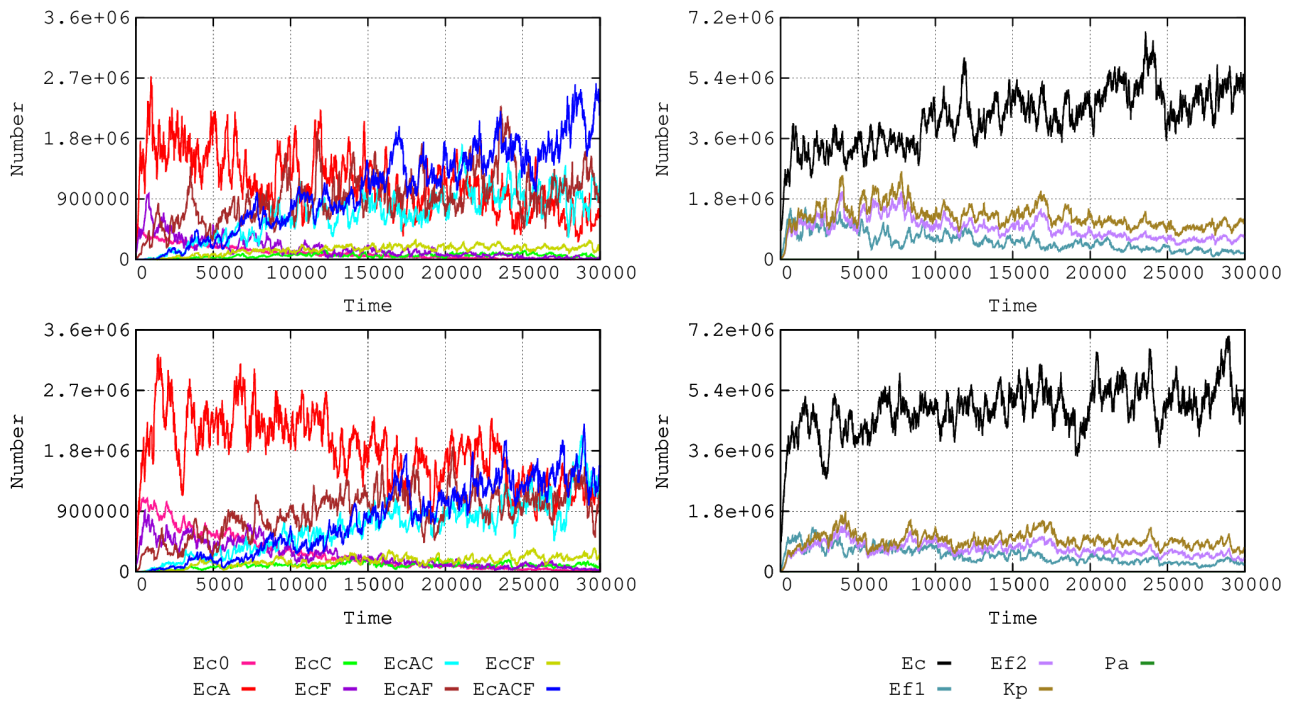

## Figure 10

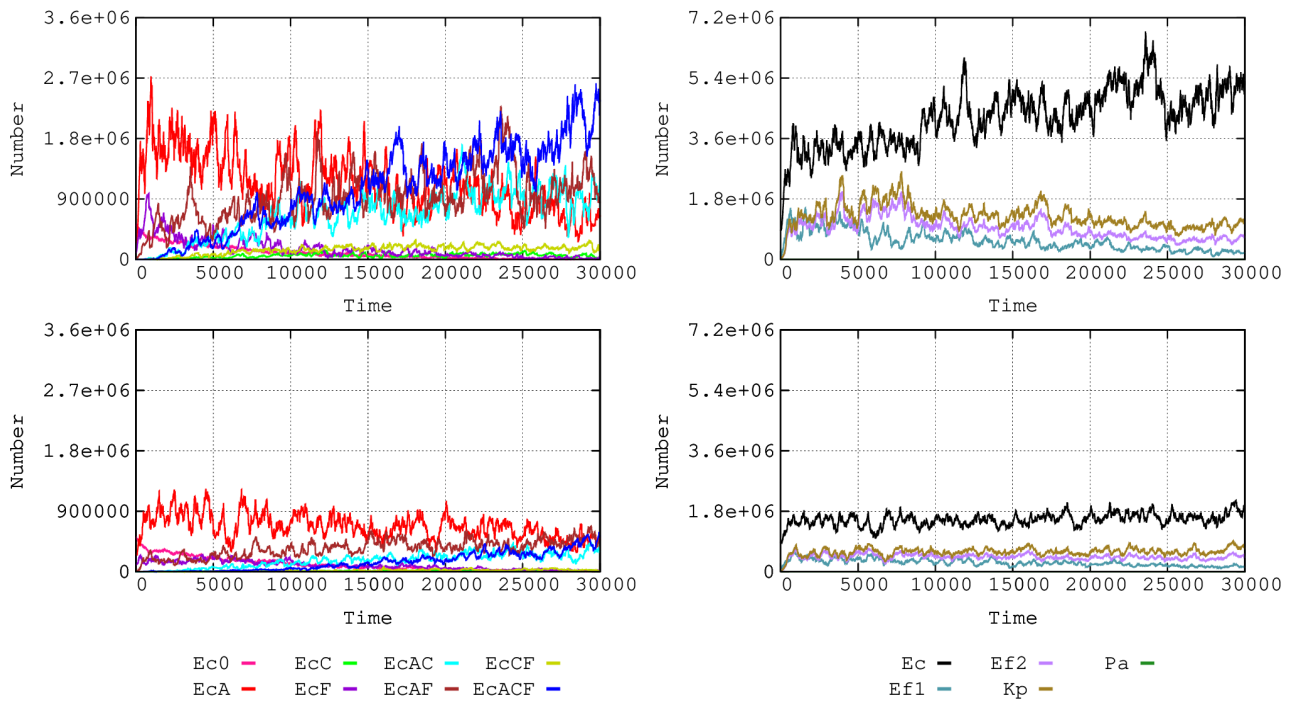

## Figure SM1

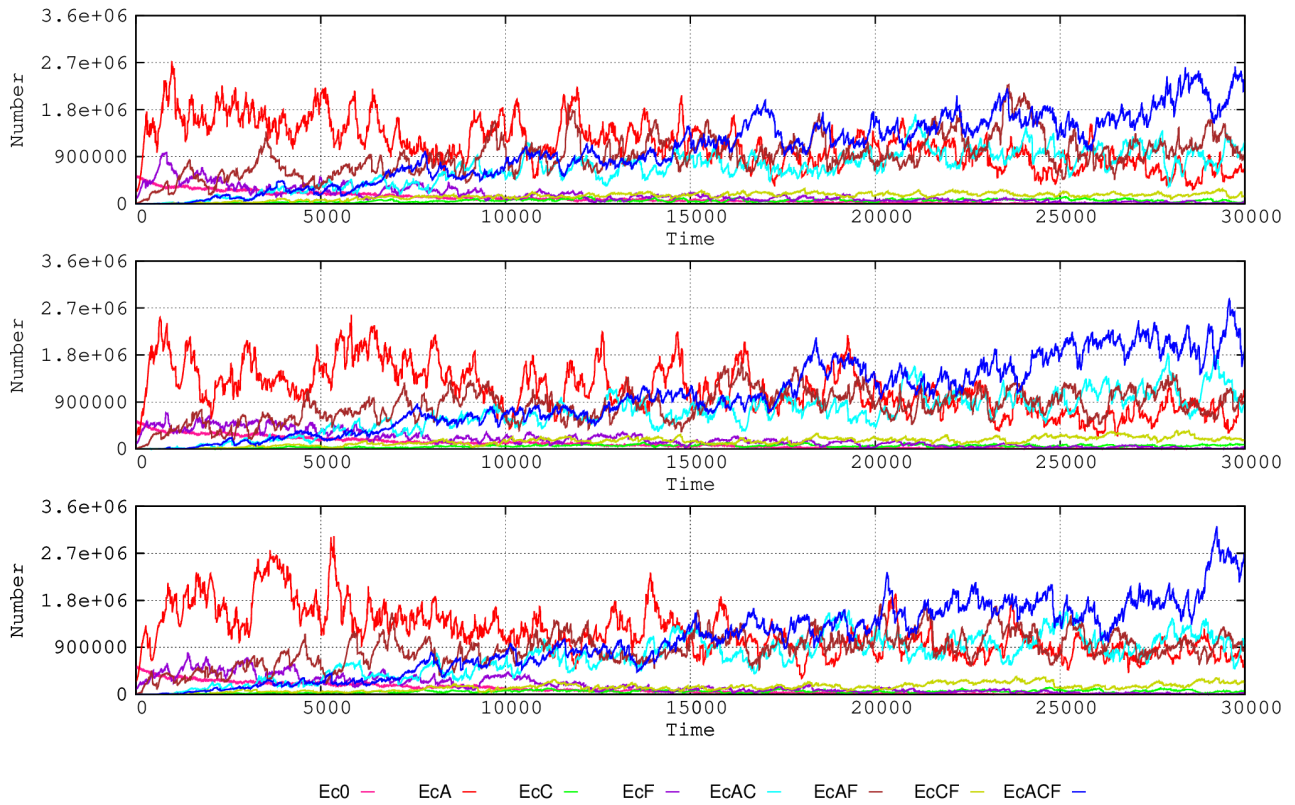

## Figure SM2

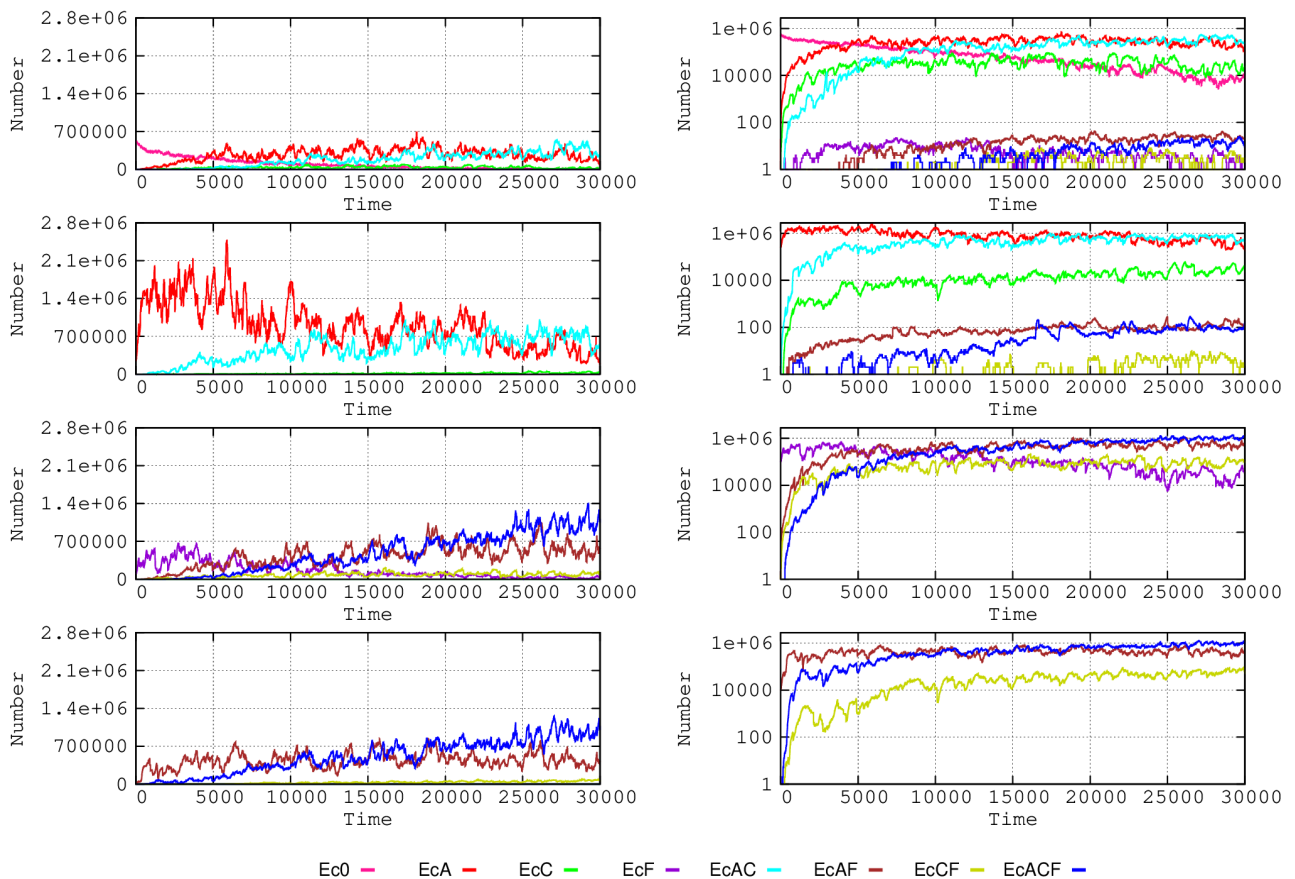



## Figure SM3

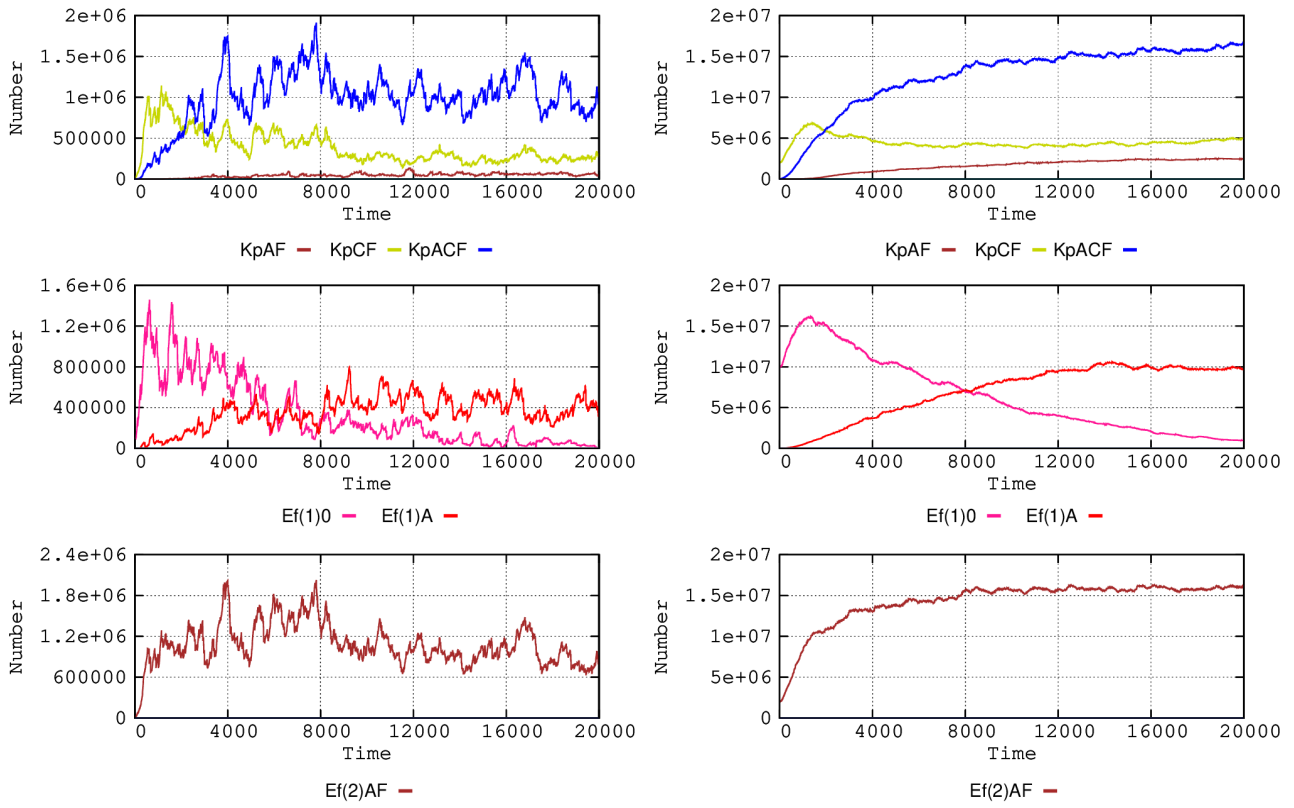

## Figure SM4

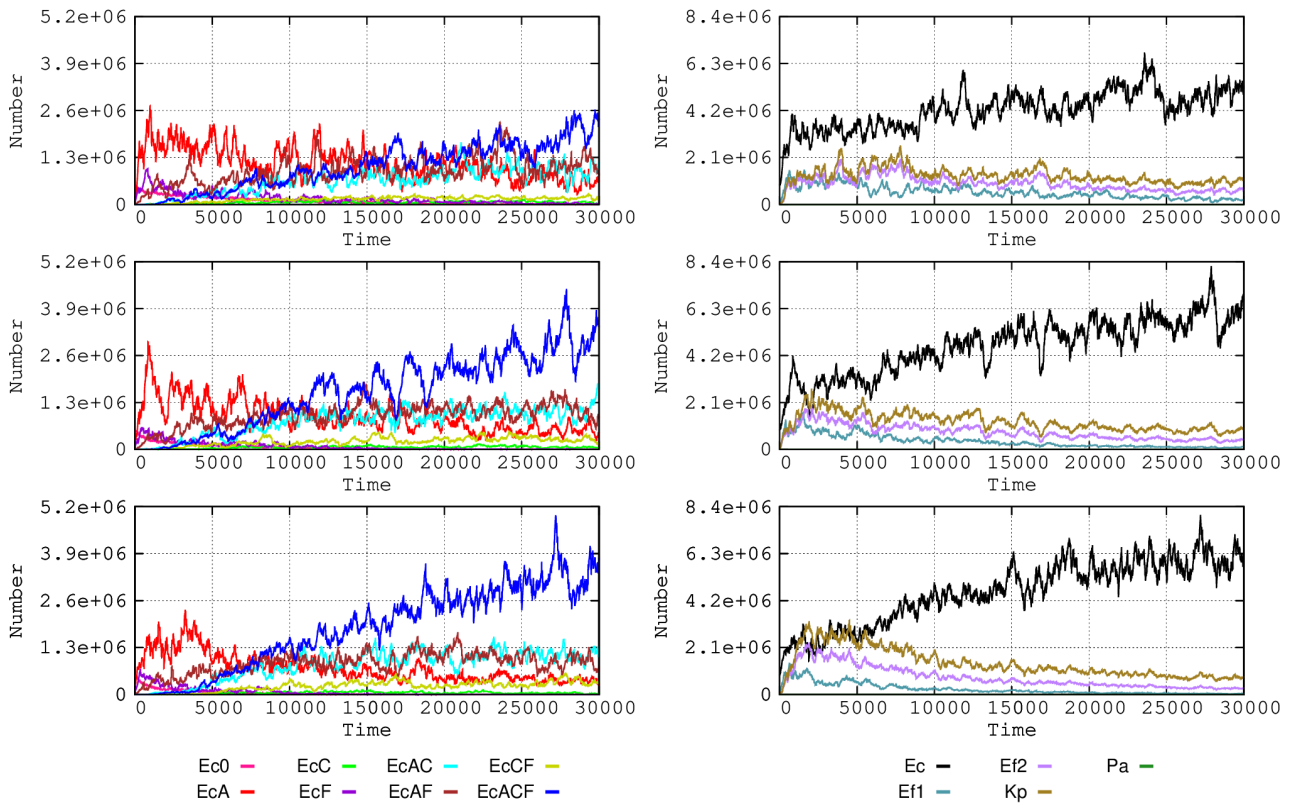

## Figure SM5

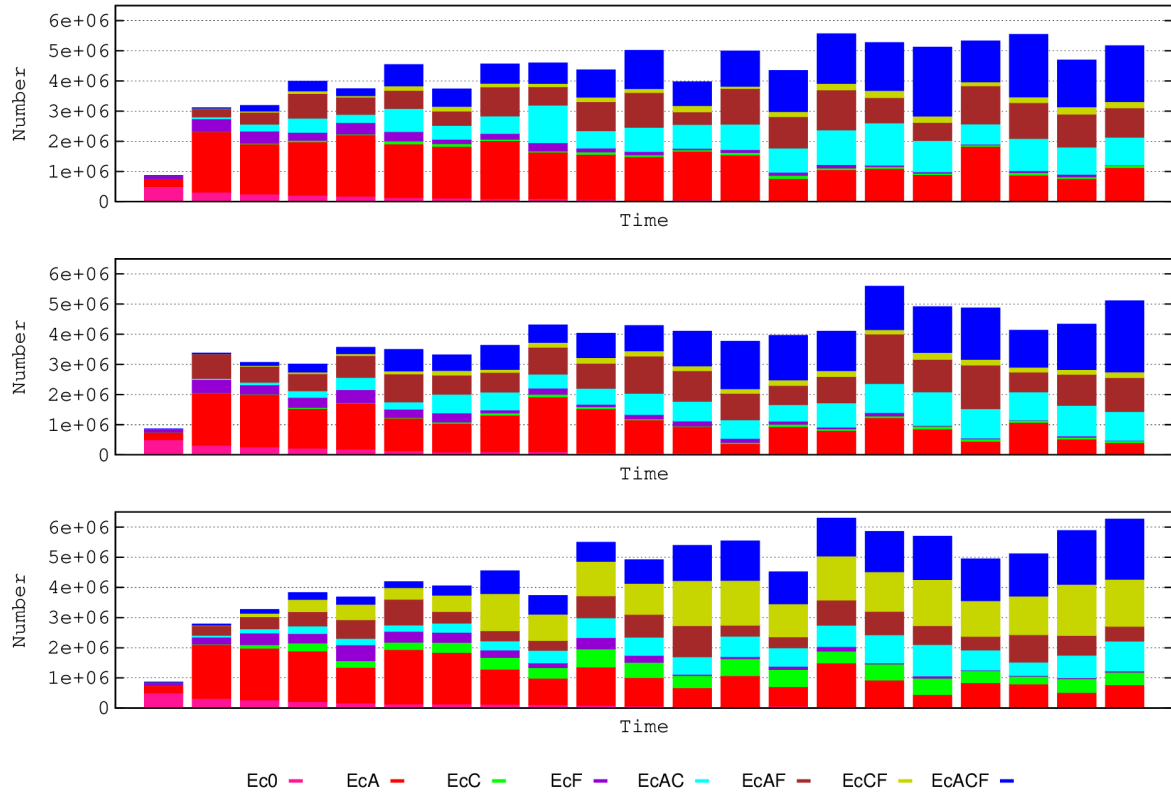

Source: https://www.biorxiv.org/content/10.1101/306100v2.full.pdf
